# Supplementary material for: scCDX: enhancing cancer driver gene identification and model interpretability with single-cell RNA sequencing data and extreme gradient boosting
Source: Research Square preprint supplement (doi:10.21203/rs.3.rs-4222777/v1), 2024-04-11
Supplement: Supplementary file 1 [file 1b6037d7708ab170d59d6f6d.xlsx]

## Sheet: Cancer samples
Accession ID
AML0024_3p
AML003_3p
AML0048_3p
AML006_3p
AML008_3p
AML0102_5p
AML0114_3p
AML012_3p
AML0160_3p
AML028_3p
AML0310_3p
AML043_3p
AML052_3p
AML056_3p
AML073_3p
AML1133_5p
AML1371_3p
AML2123_3p
AML2451_3p
AML2910_3p
AML3050_3p
AML3133_3p
AML3730_3p
AML3762_3p
AML3948_3p
AML3948_5p
AML4340_3p
AML4897_3p
GSM4135804
GSM6412450
GSM6412454
PAUMTZ_3p
PAWWEE_3p
PAXMIJ_3p
GSM3588000
GSM4135802
AML009_3p
AML022_3p
AML0361_3p
AML038_3p
GSM3587942
GSM3587950
GSM4135788
GSM4135795
GSM4135797
GSM6412449
GSM6412451
AML026_3p
AML048_3p
AML055_3p
AML0693_3p
AML3266_3p
GSM3587963
GSM3587971
GSM3587990
GSM4135787
GSM4135800
GSM4135809
GSM4721204
GSM6447735
AML025_3p
AML051_3p
AML0612_3p
AML2975_5p
GSM6412453
GSM4135777
GSM4135778
GSM4135780
GSM4135784
GSM4135785
GSM4135790
GSM4135791
GSM4135794
GSM4135798
GSM4135799
GSM4135803
GSM6412447
GSM3587969
GSM3587988
GSM3588002
GSM3753192
GSM3753193
GSM3753194
GSM4135774
GSM4135776
GSM4135779
GSM4135781
GSM4135782
GSM4135783
GSM4135786
GSM4135789
GSM4135792
GSM4135796
GSM4135801
GSM4135805
GSM4135807
GSM4135808
GSM4135810
GSM4135811
GSM4135812
GSM6412452
GSM6412455
AML0134_5p
GSM3587923
GSM4135775
GSM4721202
GSM4835995
GSM3587933
GSM4721197
GSM4835996
GSM4835998
GSM4835999
GSM4836000
GSM4836001
GSM4836002
GSM6412448
GSM3587937
GSM4135793
GSM4721199
AML052_5p
GSM3588003
AML009_5p
AML051_5p
AML0693_5p
GSM3587965
AML2910_5p
GSM3587931
GSM3587957
GSM3587967
GSM5342411
GSM5342420
GSM3587955
GSM3587973
GSM3587935
CRX030762
CRX030763
CRX030766
CRX030767
CRX030768
CRX030772
CRX030774
CRX030776
CRX030778
CRX030780
CRX030781
CRX030782
CRX030783
CRX030785
GSM6567157
GSM6567159
GSM6567161
GSM6567163
GSM6567164
CRX030764
CRX030765
CRX030769
CRX030771
CRX030773
CRX030775
CRX030777
CRX030779
CRX030784
GSM6567160
CRX030770
GSM6533099
GSM6533100
GSM4730261
GSM4730262
GSM4730260
GSM6481923
CRX075191
CRX075193
CRX075195
CRX075197
CRX075199
GSM3064821
GSM4735097
GSM4735099
GSM4735103
GSM4735105
GSM4735107
GSM4735108
GSM4735109
GSM4735110
GSM4735111
GSM4735117
GSM4735118
GSM4735120
GSM4735121
GSM4735123
GSM4735150
GSM4955419
GSM4955420
GSM4955421
GSM4955426
GSM5709317
GSM5709318
GSM5709319
GSM5709322
GSM5709323
GSM5709326
GSM5709327
GSM5709328
GSM5709330
GSM5709331
GSM5709332
GSM5709337
SRS8863265
SRS8863268
SRS8863269
GSM3064819
GSM4735133
SRS8863272
GSM4735132
GSM4735134
GSM5709320
GSM4735124
GSM4735127
GSM4735128
GSM4735129
GSM4735130
GSM4735135
GSM4735147
GSM6435354
SRS8863267
GSM3064822
GSM4735126
GSM5709325
GSM3064824
GSM4365555
GSM6435355
GSM6508441
SRS8863270
SRS8863271
GSM3064818
GSM5709315
GSM5709336
ERX2757104
ERX2757105
ERX2757106
ERX2757107
ERX2757109
ERX2757111
ERX2757112
ERX2757113
ERX2757108
ERX3577858
ERX3577859
ERX3577861
ERX3577862
ERX3577864
ERX3577865
ERX3577867
ERX3577868
ERX3577870
ERX3577873
ERX3577874
ERX3577877
ERX3577879
ERX3577880
ERX3577883
ERX3577871
GSM4994386
GSM4047948
GSM4047944
GSM4047945
GSM4047946
GSM4047947
GSM4047950
GSM4047951
ERX3669902
ERX3989371
ERX3989372
ERX3989373
ERX3989374
ERX3989375
ERX3989376
ERX3989377
ERX3989378
GSM2758471
GSM2758473
GSM2758474
GSM2758477
GSM2940098
GSM4202144
GSM4202145
GSM4202146
GSM4202147
GSM4483751
GSM4483758
GSM5705583
GSM6939133
GSM6939135
GSM6939136
GSM6939137
GSM7011674
GSM2758472
GSM2758476
GSM4955731
GSM4955732
GSM4955733
GSM4955734
GSM4955735
GSM4955736
GSM4955737
GSM4955738
GSM6939134
GSM6939138
GSM7011676
GSM4483752
GSM2758475
GSM2877959
GSM2877960
GSM3011853
GSM3011854
GSM3148579
GSM3148638
GSM3148639
GSM4695531
GSM4695537
GSM4695549
GSM4695555
GSM4909281
GSM4909288
GSM4909289
GSM4909290
GSM4909294
GSM4909302
GSM4909315
GSM5354536
GSM5769292
GSM5769293
GSM3148575
GSM3148576
GSM3148577
GSM3148578
GSM3148605
GSM3148624
GSM3148625
GSM3148627
GSM3148629
GSM3148630
GSM3148636
GSM5354514
GSM5354524
GSM5354525
GSM5354530
GSM5354531
GSM5974488
GSM6259915
GSM3044521
GSM3044522
GSM3044523
GSM3044524
GSM4365547
GSM4735151
GSM4735152
GSM4735153
SRS8863266
GSM3064823
GSM4735145
GSM4735104
GSM4365551
GSM6508439
GSM3148585
GSM3148586
GSM3148614
GSM3148615
GSM3148616
GSM3148617
GSM3148618
GSM3148619
GSM3148620
GSM5769285
GSM5769286
GSM5769287
GSM3148593
GSM3148594
GSM3148604
GSM3148606
GSM3148607
GSM3148621
GSM3148622
GSM3148623
GSM3148626
GSM3148632
GSM4909303
GSM4909317
GSM5354520
GSM3148631
GSM3148633
GSM4695525
GSM4695539
GSM4695553
GSM4909282
GSM4909283
GSM4909284
GSM4909287
GSM4909291
GSM4909292
GSM4909295
GSM4909296
GSM4909298
GSM4909299
GSM4909300
GSM4909301
GSM4909304
GSM4909305
GSM4909306
GSM4909307
GSM4909309
GSM4909313
GSM4909319
GSM5354513
GSM5354515
GSM5354517
GSM5354518
GSM5354519
GSM5354522
GSM5354523
GSM5354526
GSM5354527
GSM5354528
GSM5354532
GSM5354533
GSM5354534
GSM5354537
GSM5354538
GSM5769279
GSM5769281
GSM5769283
GSM5769291
GSM5852268
GSM5852269
GSM5852270
GSM5852271
GSM5852272
GSM5852273
GSM5852275
GSM5852276
GSM5852278
GSM5852282
GSM5852284
GSM5852286
GSM6259912
GSM6259913
GSM6259914
GSM6533097
GSM6533098
GSM3148635
GSM5354535
GSM3148595
GSM3148596
GSM3148597
GSM3148598
GSM3148599
GSM3148600
GSM5769278
GSM5769290
GSM4909318
GSM3148612
GSM4695528
GSM4695530
GSM4695534
GSM4695538
GSM4695544
GSM4695545
GSM4695548
GSM4695552
GSM4695554
GSM4909293
GSM4909297
GSM5354516
GSM5354521
GSM5354529
GSM4695542
GSM5974486
GSM5974487
GSM4909311
GSM4909285
GSM4909286
GSM3265101
GSM4472055
GSM4472057
GSM3478791
GSM3478792
GSM3583861
GSM3583862
GSM3583863
GSM3583864
GSM3583865
GSM3583866
GSM3583867
GSM3583868
GSM4238541
GSM6217976
GSM6217981
GSM6217978
GSM6217983
GSM3583870
GSM3583871
GSM3583872
GSM3583874
GSM3583875
GSM5068908
GSM5068909
GSM5068911
GSM5068912
GSM5068914
GSM5068915
GSM3583873
GSM4835997
GSM3872434
GSM3872435
GSM3872436
GSM3872437
GSM3872438
GSM3872439
GSM3872440
GSM3872441
GSM4047952
GSM4047953
GSM4047954
GSM4047955
GSM4047956
GSM4047957
GSM4047958
GSM4047959
GSM4088774
GSM4088775
GSM4088776
GSM4088777
GSM4088778
GSM4088779
GSM4088780
GSM4088781
GSM4088782
GSM4088783
GSM4654669
GSM4654670
GSM4654671
GSM4654672
GSM4654673
GSM4654674
GSM4116580
GSM4116581
GSM4116583
GSM5237047
GSM5237048
GSM5237049
GSM5237050
GSM5513591
GSM5709304
GSM6416065
GSM5237045
GSM5237046
GSM5709306
GSM5709307
GSM5709312
GSM5709334
GSM6416066
GSM4116584
GSM4116585
GSM5513590
GSM6416067
GSM5709309
GSM5709314
GSM5709310
GSM5709333
GSM4138110
GSM4138112
GSM4138114
GSM4138116
GSM4138118
GSM4138120
GSM4138122
GSM4138124
GSM4138126
GSM4138128
GSM4138130
GSM4138132
GSM4138134
GSM4138136
GSM4138138
GSM4138140
GSM4138142
GSM4138144
GSM4138146
GSM4138148
GSM4138150
GSM4138152
GSM4138154
GSM4138156
GSM4138158
GSM4138160
GSM4138113
GSM4138115
GSM4138123
GSM4138137
GSM4138145
GSM4138153
GSM4138159
GSM4138161
GSM4138878
GSM4138879
GSM4138881
GSM4138882
GSM4138886
GSM4138887
GSM4138883
GSM4138884
GSM4138880
GSM4138885
GSM4205686
GSM4205687
GSM4205688
GSM4205689
GSM4222796
GSM4222797
GSM4238542
GSM4238543
GSM4238544
GSM4284223
GSM4284225
GSM4284227
GSM4284232
GSM4284234
GSM4284236
GSM4284246
GSM4284238
GSM4284240
GSM4284244
GSM4284242
GSM4284231
GSM4384913
GSM4384914
GSM4384915
GSM4384916
GSM4384924
GSM4384925
GSM4384926
GSM4384927
GSM4384931
GSM4384922
GSM4384923
GSM4455932
GSM4455937
GSM4455935
GSM4998197
GSM6934290
GSM6934296
GSM6934303
GSM4952967
GSM4998200
GSM4998203
GSM4998206
GSM6934283
GSM6934284
GSM6934294
GSM6934298
GSM6934300
GSM6934302
GSM4550464
GSM4550465
GSM4550466
GSM4550467
GSM4550468
GSM4550469
GSM4550470
GSM4550472
GSM4550473
GSM4550474
GSM4550475
GSM4550477
GSM4550478
GSM4559280
GSM4559281
GSM4586332
GSM4586333
GSM4586334
GSM4586336
GSM4586337
GSM4586339
GSM4603512
GSM4603513
GSM4929846
GSM4929848
GSM4929850
GSM4929852
GSM4929854
GSM4929856
GSM4929858
GSM4929860
GSM4929862
GSM4929864
GSM4550471
GSM4550476
GSM4586335
GSM4600954
GSM4600955
GSM4600956
GSM4600957
GSM4600958
GSM4600959
GSM4600960
GSM4600961
GSM4600962
GSM4600963
GSM4600964
GSM4600965
GSM4600966
GSM4600967
GSM4600968
GSM4600969
GSM4600970
GSM4600971
GSM4600973
GSM4600974
GSM4600975
GSM4600976
GSM4600977
GSM4600978
GSM4600979
GSM4600980
GSM4600981
GSM4601011
GSM4601022
GSM4601023
GSM4601024
GSM4601025
GSM4601026
GSM4601027
GSM4601028
GSM4601029
GSM4601006
GSM4601007
GSM4601008
GSM4601009
GSM4601010
GSM4601012
GSM4601013
GSM4600990
GSM4600991
GSM4600994
GSM4600996
GSM4600992
GSM4600995
GSM4600997
GSM4704524
GSM4704525
GSM4704526
GSM4704528
GSM4704529
GSM4704530
GSM4704531
GSM4704532
GSM4704534
GSM4704535
GSM4704536
GSM4704537
GSM4704538
GSM4704539
GSM4704541
GSM4704542
GSM4704543
GSM4704544
GSM4704545
GSM4704546
GSM4704547
GSM4704548
GSM4704549
GSM4704550
GSM4704551
GSM4704552
GSM4730269
GSM4730270
GSM4730273
GSM4730274
GSM4730275
GSM4730276
GSM4730271
GSM4730272
GSM4796528
GSM4796529
GSM4796530
GSM4810692
GSM4810693
GSM4850288
GSM4850289
GSM4909314
GSM4909316
GSM5769280
GSM5769288
GSM5769289
GSM4929845
GSM4929847
GSM4929849
GSM4929851
GSM4929853
GSM4929855
GSM4929857
GSM4929859
GSM4929861
GSM4929863
GSM4933431
GSM4933432
GSM4933434
GSM4933433
GSM6934304
GSM4952969
GSM5023320_2
GSM5023321
GSM5023323
GSM5023324_1
GSM6509142
GSM5023324_2
GSM5065164
GSM5065165
GSM5065166
GSM5065167
GSM5101014
GSM5101015
GSM5101016
GSM5101017
GSM5101019
GSM5101020
GSM5101022
GSM5101023
GSM5101026
GSM5116954
GSM5116955
GSM5116956
GSM5116957
GSM5116958
GSM5116959
GSM6112133
GSM6112134
GSM6112135
GSM6112136
GSM6094425
GSM5258385
GSM5258386
GSM5258387
GSM5258388
GSM5258389
GSM5258390
GSM5293881
GSM5293883
GSM5293884
GSM5293885
GSM5293886
GSM5293891
GSM5293894
GSM5293895
GSM5293897
GSM5293882
GSM5293892
GSM5293900
GSM5342415
GSM5342416
GSM5342417
GSM5342424
GSM5342418
GSM5342421
GSM5342422
GSM5467407
GSM5467409
GSM5467412
GSM5494348
GSM5494368
GSM5494371
GSM5494375
GSM5494377
GSM5494379
GSM5611317
GSM5611318
GSM5494349
GSM5494350
GSM5494352
GSM5494354
GSM5494356
GSM5494358
GSM5494359
GSM5494360
GSM5494363
GSM5494365
GSM5494369
GSM5494373
GSM5611313
GSM5611315
GSM5494362
GSM5611312
GSM5611314
GSM5611316
GSM5513589
GSM5585006
GSM5585014
GSM5585019
GSM5585026
GSM5585027
GSM5585028
GSM5585031
GSM5585038
GSM5585043
GSM5585045
GSM5585046
GSM5585048
GSM5585053
GSM5585015
GSM5585025
GSM5585039
GSM5585049
GSM5585051
GSM5710532
GSM5710533
GSM5710534
GSM5710536
GSM5710537
GSM5710538
GSM5710540
GSM5710541
GSM5813745
GSM5813746
GSM5813747
GSM5813750
GSM5813751
GSM5813752
GSM5813753
GSM5813756
GSM5813757
GSM5813758
GSM5813759
GSM5813760
GSM5813761
GSM5813762
GSM5813764
GSM6939028
GSM6939030
GSM6939032
GSM6939033
GSM6939034
GSM6939035
GSM6939036
GSM6939037
GSM6939038
GSM6939039
GSM6939040
GSM6939041
GSM6939042
GSM6939044
GSM6939045
GSM6939046
GSM6939047
GSM6939048
GSM6939050
GSM6939052
GSM6939053
GSM6939054
GSM6939055
GSM6939057
GSM6939058
GSM6939059
GSM6939060
GSM6939061
GSM6939062
GSM6939063
GSM6939064
GSM6939065
GSM6939066
GSM6939067
GSM6939068
GSM6939069
GSM6939070
GSM6939071
GSM6939072
GSM6939073
GSM6939074
GSM6939075
GSM6939076
GSM6939077
GSM6939078
GSM6939079
GSM6939080
MMRF_1267_1_WUSTL_scRNA_seq
MMRF_1267_2_scRNA_seq_WUSTL
MMRF_1267_CITE_seq_BIDMC
MMRF_1325_CITE_seq_BIDMC
MMRF_1325_scRNA_seq_WUSTL
MMRF_1413_CITE_seq_BIDMC
MMRF_1413_scRNA_seq_WUSTL
MMRF_1424_scRNA_seq_WUSTL
MMRF_1505_CITE_seq_BIDMC
MMRF_1505_scRNA_seq_ISMMS
MMRF_1505_scRNA_seq_WUSTL
MMRF_1537_CITE_seq_BIDMC
MMRF_1537_scRNA_seq_WUSTL
MMRF_1640_CITE_seq_BIDMC
MMRF_1640_scRNA_seq_WUSTL
MMRF_1641_1_CITE_seq_BIDMC
MMRF_1641_2_CITE_seq_BIDMC
MMRF_1641_scRNA_seq_WUSTL
MMRF_1686_CITE_seq_BIDMC
MMRF_1686_scRNA_seq_WUSTL
MMRF_1695_1_CITE_seq_BIDMC
MMRF_1695_scRNA_seq_WUSTL
MMRF_1720_CITE_seq_BIDMC
MMRF_1720_scRNA_seq_WUSTL
MMRF_1777_scRNA_seq_WUSTL
MMRF_1941_CITE_seq_BIDMC
MMRF_1941_scRNA_seq_ISMMS
MMRF_1941_scRNA_seq_WUSTL
MMRF_1967_1_scRNA_seq_WUSTL
MMRF_1967_2_scRNA_seq_WUSTL
MMRF_1967_CITE_seq_BIDMC
MMRF_2038_CITE_seq_BIDMC
MMRF_2038_scRNA_seq_WUSTL
MMRF_2168_CITE_seq_BIDMC
MMRF_2168_scRNA_seq_WUSTL
MMRF_2251_CITE_seq_BIDMC
MMRF_2251_scRNA_seq_ISMMS
MMRF_2251_scRNA_seq_WUSTL
MMRF_2259_CITE_seq_BIDMC
MMRF_2259_scRNA_seq_WUSTL
GSM6939031
GSM6939081
GSM6063506
GSM6063512
GSM6063524
GSM6063518
GSM6063532
GSM6063514
GSM6063528
GSM6063534
GSM6063530
GSM6063536
GSM6217975
GSM6217979
GSM6290518
GSM6290522
GSM6290524
GSM6290526
GSM6290532
GSM6290536
GSM6290540
GSM6290542
GSM6290544
GSM6290546
GSM6290552
GSM6290554
GSM6290530
GSM6290534
GSM6290538
GSM7028034
GSM7028035
GSM7028036
GSM7028037
GSM7028038
GSM7028039
GSM6290548
GSM6416064
GSM6428649
GSM6432683
GSM6432684
GSM6432686
GSM6432687
GSM6432688
GSM6432689
GSM6432690
GSM6432708
GSM6432718
GSM6432727
GSM6432728
GSM6432729
GSM6432731
GSM6432732
GSM6432691
GSM6432692
GSM6432707
GSM6432710
GSM6432713
GSM6432720
GSM6432725
GSM6432735
GSM6432738
GSM6432739
GSM6432723
GSM6432714
GSM6432726
GSM6432709
GSM6432685
GSM6432705
GSM6432706
GSM6432711
GSM6432715
GSM6432716
GSM6432717
GSM6432719
GSM6432721
GSM6432722
GSM6432733
GSM6432734
GSM6432736
GSM6432703
GSM6432704
GSM6432737
GSM6432730
GSM6432712
GSM6507608
GSM6507610
GSM6576369
GSM6576372
GSM6603324
GSM6603325
GSM6603326
GSM6617853
GSM6617854
GSM6617855
GSM6720925
GSM6720926
GSM6720927
GSM6720928
GSM6720929
GSM6720931
GSM6720932
GSM6934306
GSM6934307
GSM6934308
GSM6934309
GSM6934312
GSM6934311
GSM6934313
GSM6939029
GSM6939043
GSM6939049
GSM6939051
MMRF_1777_CITE_seq_BIDMC
MMRF_1424_CITE_seq_BIDMC
MMRF_1695_2_CITE_seq_BIDMC
GSM7011673
GSM7011675
SRX8895259
SRX8895261
SRX8895262
SRX8895263
SRX8895264
SRX8895266
SRX8895260
SRX8895265
SRX9087495
SRX9087496
SRX9087498
SRX9087499
SRX9087500
SRX9087501
SRX9087502
SRX9087503

## Sheet: Normal samples
Accession ID
B1_AA220014_HC
B1_AA220534_HC
B1_AA220907_HC
B1_CHI014_HC
B1_IM000040_HC
B2_CHI014_HC
B2_HDML_PBMC_HC
B2_HDVO_PBMC_HC
B2_SHD2_HC
B2_SHD4_HC
B2_SHD7_HC
B3_CHI014_HC
B3_SHD1_HC
B3_SHD3_HC
B3_SHD5_HC
B3_SHD6_HC
ERX2756718
ERX2756719
ERX2756720
ERX2756727
ERX2756728
ERX4219953
ERX4219954
ERX4607510
ERX4607513
ERX4809633
ERX4809634
ERX4809635
ERX4809636
ERX4809637
ERX4809639
ERX4809640
ERX4809642
ERX8792068
GSM2773408
GSM2773409
GSM3169075
GSM3377676
GSM3564834
GSM3564837
GSM3564840
GSM3576411
GSM3576412
GSM3576420
GSM3576421
GSM3576422
GSM3576423
GSM3576425
GSM3665016
GSM3665017
GSM3665018
GSM3665019
GSM3667469
GSM3872442
GSM3872443
GSM3872444
GSM3892571
GSM3956372
GSM4008638
GSM4008639
GSM4008640
GSM4008641
GSM4008642
GSM4008643
GSM4008644
GSM4008669
GSM4008670
GSM4008671
GSM4008672
GSM4120733
GSM4120734
GSM4120735
GSM4120736
GSM4120737
GSM4120738
GSM4120739
GSM4120740
GSM4138162
GSM4138163
GSM4138164
GSM4138165
GSM4138166
GSM4138167
GSM4138876
GSM4138877
GSM4210786
GSM4210787
GSM4314543
GSM4314546
GSM4314547
GSM4314551
GSM4411625
GSM4411626
GSM4411627
GSM4473444
GSM4473445
GSM4509015
GSM4509023
GSM4509024
GSM4509029
GSM4566148
GSM4712893
GSM4712895
GSM4712897
GSM4712905
GSM4712907
GSM4750298
GSM4750299
GSM4750300
GSM4750301
GSM4750302
GSM4750303
GSM4750304
GSM4750305
GSM4750310
GSM4760620
GSM4760621
GSM4760622
GSM4760624
GSM4762184
GSM4762185
GSM4762186
GSM4762187
GSM4762188
GSM4762189
GSM4775588
GSM4775589
GSM4775594
GSM4850578
GSM4904933
GSM4904934
GSM4904935
GSM4904936
GSM4904937
GSM4905216
GSM4905217
GSM4954813
GSM4960244
GSM4960247
GSM4960251
GSM4960255
GSM4960259
GSM4960263
GSM4960266
GSM4960270
GSM4960274
GSM4960278
GSM4977697
GSM4995433
GSM4995441
GSM4995443
GSM4995448
GSM4995449
GSM4995450
GSM4995451
GSM4995452
GSM4995453
GSM4995454
GSM4995455
GSM4995456
GSM4995457
GSM4995458
GSM4995459
GSM4995460
GSM4995461
GSM4995462
GSM5009118
GSM5009119
GSM5050667
GSM5050668
GSM5050669
GSM5073064
GSM5073065
GSM5073069
GSM5073070
GSM5073071
GSM5073072
GSM5087745
GSM5090446
GSM5090448
GSM5090454
GSM5091035
GSM5091036
GSM5091037
GSM5091038
GSM5091039
GSM5091040
GSM5091041
GSM5091042
GSM5091043
GSM5091044
GSM5102900
GSM5102901
GSM5137848
GSM5137849
GSM5145401
GSM5145402
GSM5227117
GSM5227130
GSM5227131
GSM5227132
GSM5227133
GSM5227134
GSM5227138
GSM5227139
GSM5227140
GSM5227141
GSM5227142
GSM5227143
GSM5227148
GSM5333784
GSM5333785
GSM5333790
GSM5333791
GSM5333792
GSM5335490
GSM5335491
GSM5335492
GSM5335493
GSM5342391
GSM5342394
GSM5396991
GSM5396992
GSM5396993
GSM5505336
GSM5505337
GSM5505338
GSM5684307
GSM5684308
GSM5746268
GSM5746269
GSM5746270
GSM5746271
GSM5746272
GSM5746273
GSM5761208
GSM5761209
GSM5761210
GSM5761211
GSM6249272
GSM6249273
GSM6249274
GSM6249276
GSM6250006
GSM6250007
GSM6250008
GSM6674754
GSM6674755
HRR059129
HRR059130
HRR059131
HRR059132
HRX059678
HRX059679
HRX059680
HRX059681
HRX059682
HRX059683
HRX059684
HRX059685
HRX059686
HRX059688
HRX059689
HRX059690
HRX059691
HRX059692
HRX059693
JP_RIK_H001
JP_RIK_H009
JP_RIK_H013
JP_RIK_H092
JP_RIK_H108
JP_RIK_H110
JP_RIK_H112
JP_RIK_H113
JP_RIK_H116
JP_RIK_H121
JP_RIK_H127
JP_RIK_H140
KR_SGI_H043
KR_SGI_H097
KR_SGI_H124
KR_SGI_H128
KR_SGI_H132
KR_SGI_H142
KR_SGI_H161
LONZA3038099
RIKEN_H14
SAMN18497890
SAMN18497891
SAMN18497892
SGI_H1
SGI_H2
SGI_H3
SGI_H4
SIGAH12
ERX4409910
ERX8792013
GSM4557334
GSM4557335
GSM4557336
GSM4557337
GSM4557338
GSM4557339
GSM4750306
GSM4750307
GSM4750308
GSM4750309
GSM4750311
GSM4760623
GSM4775592
GSM4775593
GSM4955427
GSM5057791
GSM5057792
GSM5057793
GSM5057794
GSM5057795
GSM5057796
GSM5057797
GSM5057798
GSM5057799
GSM5057800
GSM5057801
GSM5057802
GSM5057803
GSM5057804
GSM5057805
GSM5057806
GSM5073067
GSM5073068
GSM5087793
GSM5100671
GSM5100683
GSM5100689
GSM5135218
GSM5135219
GSM5285694
GSM5285706
GSM5285707
GSM5285709
GSM5285710
GSM5285711
GSM5320459
GSM5320460
GSM5320461
GSM5320462
GSM5332298
GSM5332299
GSM5332301
GSM5332302
GSM5494116
GSM5494119
GSM5684306
GSM6119093
GSM6119095
GSM6119097
GSM6249275
GSM6578267
GSM6578268
GSM6578269
GSM6578270
GSM6601032
GSM6601033
GSM6647634
GSM6647828
GSM6837112_HD2-PBMC
JP_RIK_H002
JP_RIK_H003
JP_RIK_H004
JP_RIK_H005
JP_RIK_H006
JP_RIK_H007
JP_RIK_H008
JP_RIK_H010
JP_RIK_H011
JP_RIK_H012
JP_RIK_H014
JP_RIK_H015
JP_RIK_H016
JP_RIK_H017
JP_RIK_H018
JP_RIK_H019
JP_RIK_H020
JP_RIK_H021
JP_RIK_H022
JP_RIK_H023
JP_RIK_H024
JP_RIK_H025
JP_RIK_H026
JP_RIK_H027
JP_RIK_H028
JP_RIK_H029
JP_RIK_H031
JP_RIK_H032
JP_RIK_H033
JP_RIK_H034
JP_RIK_H035
JP_RIK_H036
JP_RIK_H037
JP_RIK_H038
JP_RIK_H039
JP_RIK_H040
JP_RIK_H041
JP_RIK_H042
JP_RIK_H043
JP_RIK_H044
JP_RIK_H045
JP_RIK_H046
JP_RIK_H047
JP_RIK_H048
JP_RIK_H049
JP_RIK_H050
JP_RIK_H051
JP_RIK_H052
JP_RIK_H053
JP_RIK_H054
JP_RIK_H055
JP_RIK_H056
JP_RIK_H057
JP_RIK_H058
JP_RIK_H059
JP_RIK_H060
JP_RIK_H061
JP_RIK_H062
JP_RIK_H063
JP_RIK_H064
JP_RIK_H065
JP_RIK_H066
JP_RIK_H067
JP_RIK_H068
JP_RIK_H069
JP_RIK_H070
JP_RIK_H071
JP_RIK_H072
JP_RIK_H073
JP_RIK_H074
JP_RIK_H075
JP_RIK_H076
JP_RIK_H077
JP_RIK_H078
JP_RIK_H079
JP_RIK_H080
JP_RIK_H081
JP_RIK_H082
JP_RIK_H083
JP_RIK_H084
JP_RIK_H085
JP_RIK_H086
JP_RIK_H087
JP_RIK_H088
JP_RIK_H089
JP_RIK_H090
JP_RIK_H091
JP_RIK_H093
JP_RIK_H094
JP_RIK_H095
JP_RIK_H096
JP_RIK_H097
JP_RIK_H099
JP_RIK_H100
JP_RIK_H101
JP_RIK_H102
JP_RIK_H103
JP_RIK_H104
JP_RIK_H105
JP_RIK_H106
JP_RIK_H107
JP_RIK_H109
JP_RIK_H111
JP_RIK_H114
JP_RIK_H115
JP_RIK_H117
JP_RIK_H118
JP_RIK_H119
JP_RIK_H120
JP_RIK_H122
JP_RIK_H123
JP_RIK_H124
JP_RIK_H125
JP_RIK_H126
JP_RIK_H128
JP_RIK_H129
JP_RIK_H130
JP_RIK_H131
JP_RIK_H132
JP_RIK_H133
JP_RIK_H134
JP_RIK_H135
JP_RIK_H136
JP_RIK_H137
JP_RIK_H138
JP_RIK_H139
JP_RIK_H141
JP_RIK_H142
JP_RIK_H143
JP_RIK_H144
JP_RIK_H145
JP_RIK_H146
JP_RIK_H147
JP_RIK_H148
JP_RIK_H149
KR_SGI_H001
KR_SGI_H002
KR_SGI_H003
KR_SGI_H004
KR_SGI_H005
KR_SGI_H006
KR_SGI_H007
KR_SGI_H008
KR_SGI_H009
KR_SGI_H010
KR_SGI_H011
KR_SGI_H012
KR_SGI_H013
KR_SGI_H014
KR_SGI_H015
KR_SGI_H016
KR_SGI_H017
KR_SGI_H018
KR_SGI_H019
KR_SGI_H020
KR_SGI_H021
KR_SGI_H022
KR_SGI_H023
KR_SGI_H024
KR_SGI_H025
KR_SGI_H026
KR_SGI_H027
KR_SGI_H028
KR_SGI_H029
KR_SGI_H030
KR_SGI_H031
KR_SGI_H032
KR_SGI_H033
KR_SGI_H034
KR_SGI_H035
KR_SGI_H036
KR_SGI_H037
KR_SGI_H038
KR_SGI_H039
KR_SGI_H040
KR_SGI_H041
KR_SGI_H042
KR_SGI_H044
KR_SGI_H045
KR_SGI_H046
KR_SGI_H047
KR_SGI_H048
KR_SGI_H049
KR_SGI_H050
KR_SGI_H051
KR_SGI_H052
KR_SGI_H053
KR_SGI_H054
KR_SGI_H055
KR_SGI_H056
KR_SGI_H057
KR_SGI_H058
KR_SGI_H059
KR_SGI_H060
KR_SGI_H061
KR_SGI_H062
KR_SGI_H063
KR_SGI_H064
KR_SGI_H065
KR_SGI_H066
KR_SGI_H067
KR_SGI_H068
KR_SGI_H069
KR_SGI_H070
KR_SGI_H071
KR_SGI_H072
KR_SGI_H073
KR_SGI_H074
KR_SGI_H075
KR_SGI_H076
KR_SGI_H077
KR_SGI_H078
KR_SGI_H079
KR_SGI_H080
KR_SGI_H081
KR_SGI_H082
KR_SGI_H083
KR_SGI_H084
KR_SGI_H085
KR_SGI_H086
KR_SGI_H087
KR_SGI_H088
KR_SGI_H089
KR_SGI_H090
KR_SGI_H091
KR_SGI_H092
KR_SGI_H093
KR_SGI_H094
KR_SGI_H095
KR_SGI_H096
KR_SGI_H098
KR_SGI_H099
KR_SGI_H100
KR_SGI_H101
KR_SGI_H102
KR_SGI_H103
KR_SGI_H104
KR_SGI_H105
KR_SGI_H106
KR_SGI_H107
KR_SGI_H108
KR_SGI_H109
KR_SGI_H110
KR_SGI_H111
KR_SGI_H112
KR_SGI_H113
KR_SGI_H114
KR_SGI_H115
KR_SGI_H116
KR_SGI_H117
KR_SGI_H118
KR_SGI_H119
KR_SGI_H120
KR_SGI_H121
KR_SGI_H122
KR_SGI_H123
KR_SGI_H125
KR_SGI_H126
KR_SGI_H127
KR_SGI_H129
KR_SGI_H130
KR_SGI_H131
KR_SGI_H134
KR_SGI_H135
KR_SGI_H136
KR_SGI_H137
KR_SGI_H138
KR_SGI_H139
KR_SGI_H140
KR_SGI_H141
KR_SGI_H143
KR_SGI_H144
KR_SGI_H145
KR_SGI_H146
KR_SGI_H147
KR_SGI_H148
KR_SGI_H149
KR_SGI_H150
KR_SGI_H151
KR_SGI_H152
KR_SGI_H153
KR_SGI_H154
KR_SGI_H155
KR_SGI_H156
KR_SGI_H157
KR_SGI_H158
KR_SGI_H160
KR_SGI_H162
KR_SGI_H163
KR_SGI_H164
KR_SGI_H165
LONZA3030004
LONZA3038016
LONZA3038097
LONZA3038306
MantonBL1_HiSeq_1
MantonBL1_HiSeq_2
MantonBL1_HiSeq_3
MantonBL1_HiSeq_4
MantonBL1_HiSeq_5
MantonBL1_HiSeq_6
MantonBL1_HiSeq_7
MantonBL1_HiSeq_8
MantonBL1_HiSeq_9
MantonBL2_HiSeq_1
MantonBL2_HiSeq_2
MantonBL2_HiSeq_3
MantonBL2_HiSeq_4
MantonBL2_HiSeq_5
MantonBL2_HiSeq_6
MantonBL2_HiSeq_7
MantonBL2_HiSeq_8
MantonBL2_HiSeq_9
MantonBL3_HiSeq_1
MantonBL3_HiSeq_2
MantonBL3_HiSeq_3
MantonBL3_HiSeq_4
MantonBL3_HiSeq_5
MantonBL3_HiSeq_6
MantonBL3_HiSeq_7
MantonBL3_HiSeq_8
MantonBL3_HiSeq_9
MantonBL4_HiSeq_1
MantonBL4_HiSeq_2
MantonBL4_HiSeq_3
MantonBL4_HiSeq_4
MantonBL4_HiSeq_5
MantonBL4_HiSeq_6
MantonBL4_HiSeq_7
MantonBL4_HiSeq_8
MantonBL4_HiSeq_9
MantonBL5_HiSeq_1
MantonBL5_HiSeq_2
MantonBL5_HiSeq_3
MantonBL5_HiSeq_4
MantonBL5_HiSeq_5
MantonBL5_HiSeq_6
MantonBL5_HiSeq_7
MantonBL5_HiSeq_8
MantonBL5_HiSeq_9
MantonBL6_HiSeq_1
MantonBL6_HiSeq_3
MantonBL6_HiSeq_4
MantonBL6_HiSeq_6
MantonBL6_HiSeq_7
MantonBL6_HiSeq_8
MantonBL6_HiSeq_9
MantonBL7_HiSeq_1
MantonBL7_HiSeq_2
MantonBL7_HiSeq_3
MantonBL7_HiSeq_4
MantonBL7_HiSeq_6
MantonBL7_HiSeq_7
MantonBL7_HiSeq_8
MantonBL7_HiSeq_9
MantonBL8_HiSeq_1
MantonBL8_HiSeq_2
MantonBL8_HiSeq_4
MantonBL8_HiSeq_5
MantonBL8_HiSeq_6
MantonBL8_HiSeq_8
MantonBL8_HiSeq_9
RIKEN_H1
RIKEN_H10
RIKEN_H11
RIKEN_H12
RIKEN_H13
RIKEN_H15
RIKEN_H16
RIKEN_H2
RIKEN_H3
RIKEN_H4
RIKEN_H5
RIKEN_H6
RIKEN_H7
RIKEN_H8
RIKEN_H9
SRX10317856
SRX10317860
SRX10317861
SRX10317864
SRX10317865
GSM3377677
GSM3454528
GSM3576424
GSM3667467
GSM3667470
GSM3738542
GSM3738543
GSM3738544
GSM3956376
GSM4288156
GSM4314550
GSM4775591
GSM4933107
GSM5091045
GSM5100668
GSM5100680
GSM5100686
GSM5134084
GSM5342397
GSM5639498
GSM5907303
GSM5907304
GSM6837112_HD1-PBMC
JP_RIK_H030
JP_RIK_H098
KR_SGI_H133
MantonBL6_HiSeq_2
MantonBL6_HiSeq_5
MantonBL7_HiSeq_5
MantonBL8_HiSeq_3
MantonBL8_HiSeq_7
SRX10317853
SRX10317854
SRX10317855
SRX10317857
SRX10317858
SRX10317859
SRX10317862
SRX10317863
SRX10317868
SRX10317869
GSM3667472
GSM4008668
GSM4314541
GSM4314542
GSM4314544
GSM4314545
GSM4314548
GSM4314549
GSM4314552
GSM4314553
GSM4314554
GSM4314555
GSM4775590
GSM4785611
GSM4933109
GSM4933113
GSM4972213
GSM4972214
GSM4980046
GSM4980047
GSM4982333
GSM4982334
GSM4982335
GSM5073066
GSM5342392
GSM5342393
GSM5342398
GSM6837112_BD1-PBMC
GSM3667468
GSM3956369
GSM3956373
GSM4498551
GSM4498552
GSM4498553
GSM4498554
GSM4933103
GSM4933105
ERX4219955
GSM2842538
GSM2842539
GSM3141011
GSM3373887
GSM3373889
GSM3956368
GSM4074309
GSM4785641
GSM5012152
GSM5012153
GSM5012155
GSM5100674
GSM5100677
GSM5119097
GSM5119098
GSM5119100
GSM5119105
GSM5119106
GSM5119108
GSM5119109
GSM5119116
GSM5119117
GSM5119121
GSM5119126
GSM5119127
GSM5342395
GSM5342396
GSM5342399
GSM5833524
GSM5833525
GSM5931335
GSM5931336
GSM5931337
GSM6448800
GSM6934329
GSM6934330
KR_SGI_H159
SRX10317866
SRX10317867
GSM3454529
GSM4785610
GSM4785612
GSM3377678
GSM3855868
GSM3956375
GSM3956377
GSM4933111
GSM5012154
GSM6428653
GSM3667471
GSM4367484
GSM4367485
GSM4367486
GSM4367490
GSM4367491
GSM4367492
GSM4367495
GSM4367496
GSM5119123
GSM6448802
GSM4199167
GSM3373888
GSM3689930
GSM6448801
GSM3591407
GSM3591408
GSM3591409
GSM3591410
GSM5285708
BCLL_10_T_1_hashing
BCLL_10_T_2_hashing
BCLL_10_T_5K
BCLL_11_T_1_hashing
BCLL_11_T_2_hashing
BCLL_11_T_5K
BCLL_12_T_1_hashing
BCLL_12_T_2_hashing
BCLL_12_T_5K
BCLL_13_T_1_hashing
BCLL_13_T_2_hashing
BCLL_13_T_5K
BCLL_14_T_1_hashing
BCLL_14_T_2_hashing
BCLL_15_T_1_hashing
BCLL_15_T_2_hashing
BCLL_2_T_hashing
BCLL_6_T_1_hashing
BCLL_6_T_2_hashing
BCLL_8_T_1_hashing
BCLL_8_T_2_hashing
BCLL_8_T_5K
BCLL_9_T_1_hashing
BCLL_9_T_5K
GSM4560815
GSM5051493
GSM5051495
GSM5051496
GSM5051497
GSM5051498
BCLL_14_T_1
BCLL_14_T_2
BCLL_14_T_5K
BCLL_2_T_5K
BCLL_9_T_2_hashing
GSM3375768
GSM3375769
GSM4138168
GSM4138170
GSM4138171
GSM4138172
GSM4837488
GSM4837489
GSM5051494
BCLL_15_T_1
BCLL_15_T_2
BCLL_2_T_1
BCLL_2_T_2
BCLL_2_T_3
BCLL_8_T_1
BCLL_8_T_2
BCLL_9_T_1
BCLL_9_T_2
GSM4138169
GSM4148370
GSM5804897
GSM5804899
CNTRL1_3p
CNTRL2_3p
CNTRL4_3p
Control0004_5p
Control0005_3p
Control0058_3p
Control4003_5p
DSOX19_GEX
ERX4147013
ERX4327587
ERX4327589
ERX4327611
ERX4720933
ERX4720934
ERX4720936
ERX4720937
ERX4720939
GSM3396166
GSM3396168
GSM3396169
GSM3396170
GSM3396175
GSM3396176
GSM3396183
GSM3396185
GSM3681518
GSM3738538
GSM3738539
GSM4850584
GSM5356723
GSM5415745
GSM5515743
GSM5600718
GSM5600719
GSM5600720
GSM5600722
GSM5774293
GSM5774294
GSM6601035
GSM6939082
GSM6939083
GSM6939084
GSM6939085
GSM6939087
GSM6939088
MantonBM1_HiSeq_1
MantonBM1_HiSeq_3
MantonBM1_HiSeq_4
MantonBM1_HiSeq_5
MantonBM1_HiSeq_6
MantonBM1_HiSeq_7
MantonBM1_HiSeq_8
MantonBM1_HiSeq_9
MantonBM2_HiSeq_1
MantonBM2_HiSeq_2
MantonBM2_HiSeq_3
MantonBM2_HiSeq_4
MantonBM2_HiSeq_5
MantonBM2_HiSeq_6
MantonBM2_HiSeq_7
MantonBM2_HiSeq_8
MantonBM2_HiSeq_9
MantonBM3_HiSeq_1
MantonBM3_HiSeq_2
MantonBM3_HiSeq_3
MantonBM3_HiSeq_4
MantonBM3_HiSeq_5
MantonBM3_HiSeq_6
MantonBM3_HiSeq_7
MantonBM3_HiSeq_8
MantonBM3_HiSeq_9
MantonBM4_HiSeq_1
MantonBM5_HiSeq_1
MantonBM5_HiSeq_2
MantonBM5_HiSeq_3
MantonBM5_HiSeq_4
MantonBM5_HiSeq_5
MantonBM5_HiSeq_6
MantonBM5_HiSeq_7
MantonBM5_HiSeq_8
MantonBM5_HiSeq_9
MantonBM6_HiSeq_1
MantonBM6_HiSeq_2
MantonBM6_HiSeq_4
MantonBM6_HiSeq_5
MantonBM6_HiSeq_6
MantonBM6_HiSeq_7
MantonBM6_HiSeq_8
MantonBM6_HiSeq_9
MantonBM7_HiSeq_1
MantonBM7_HiSeq_2
MantonBM7_HiSeq_3
MantonBM7_HiSeq_5
MantonBM7_HiSeq_7
MantonBM7_HiSeq_8
MantonBM7_HiSeq_9
MantonBM8_HiSeq_1
MantonBM8_HiSeq_5
MantonBM8_HiSeq_9
CNTRL3_3p
Control0004_3p
Control0082_3p
Control4003_3p
Control5_3p
GSM5600723
MantonBM1_HiSeq_2
MantonBM4_HiSeq_2
MantonBM4_HiSeq_3
MantonBM4_HiSeq_4
MantonBM4_HiSeq_5
MantonBM4_HiSeq_6
MantonBM4_HiSeq_7
MantonBM4_HiSeq_8
MantonBM4_HiSeq_9
MantonBM7_HiSeq_4
MantonBM7_HiSeq_6
MantonBM8_HiSeq_2
MantonBM8_HiSeq_3
MantonBM8_HiSeq_4
MantonBM8_HiSeq_6
MantonBM8_HiSeq_7
MantonBM8_HiSeq_8
Control0082_5p
ERX4147018
ERX4327591
ERX4327607
ERX4720938
ERX4720940
ERX4720942
ERX8791950
ERX8791986
ERX8792088
GSM3396161
GSM3396162
GSM3396163
GSM3396164
GSM3396165
GSM3396167
GSM3396171
GSM3396172
GSM3396173
GSM3396174
GSM3396177
GSM3396178
GSM3396182
GSM3396184
GSM3993353
GSM3993354
GSM4138872
GSM4138873
GSM5047372
GSM5342385
GSM5342386
GSM5505339
GSM5505340
GSM5600721
GSM6939086
Control0182_5p
ERX3794001
ERX3794002
ERX3794003
ERX3794004
ERX3794005
ERX3794006
ERX3794007
ERX4327592
ERX4327600
GSM5356722
GSM5898065
ERX4327605
ERX4327606
GSM5672602
ERX4327576
ERX4327584
ERX4327585
ERX4327586
ERX4327599
ERX4327602
ERX4327604
ERX4327609
ERX4327612
ERX4720941
ERX8792009
GSM3305369
GSM3943045
GSM3980128
GSM4135770
GSM4135771
GSM4135772
GSM5087731
GSM5087739
GSM3305364
GSM3305366
GSM3305368
GSM3993355
GSM4138875
GSM5087733
GSM5087735
GSM5898064
GSM5898066
GSM5898067
ERX4327575
ERX4327582
ERX4327583
ERX4327588
ERX4327590
ERX4327603
GSM3305359
GSM3305360
GSM3305363
ERX4327608
ERX3794000
GSM3305367
GSM3396179
GSM3396181
GSM4138874
ERX4327597
ERX4327598
GSM5202204
GSM5515744
ERX3793987
ERX3793988
ERX3793989
ERX3793990
ERX3793991
ERX3793992
ERX3793993
ERX4327593
ERX8792052
GSM5813730
GSM5813731
GSM5813734
GSM5813735
GSM5813736
GSM5813737
GSM5813738
GSM5972359
GSM6601034
GSM6601036
ERX4720935
GSM3396180
GSM5342387
GSM5342388
GSM5342389
GSM5342390
ERX4327573
ERX4327574
ERX3793999
GSM3738536
GSM3738540
GSM3738541
GSM4836003
GSM4836004
GSM4836005
GSM4836006
GSM4836007
GSM4836008
GSM4836009
GSM4836010
GSM6601037
ERX3793994
ERX3793995
ERX3793996
ERX3793997
ERX3793998
ERX4327579
ERX4327595
ERX4327596
ERX4327610
GSM3738537
GSM3305361
GSM3305365
GSM3901488
GSM3993352
GSM5202203
GSM6617856
ERX4327578
ERX4327580
ERX4327581
ERX3989379
ERX3989380
ERX3989381
GSM3305362
GSM3901485
GSM3901486
GSM3901487
GSM3901492
CRX030786
CRX030787
CRX030788
CRX030789
CRX030791
CRX030792
CRX030793
CRX030794
CRX030795
CRX030796
GSM4008705
CRX030790
GSM4008637
GSM4008706
GSM5907965_12PCW
GSM5907965_13PCW
GSM5907965_13PCW_1
GSM5907966_12PCW
GSM5907966_14PCW
GSM5907966_19PCW
GSM5907967_13PCW
GSM5907968_15PCW
GSM5907968_18PCW
GSM4453619
GSM4453621
GSM4453622
GSM4008704
GSM5032773
GSM5907967_14PCW
GSM5907967_19PCW
GSM4453620
GSM4453623
GSM4453624
GSM4656102
GSM4656103
GSM4656107
GSM5907968_20PCW
ERX4327577
ERX4327601
ERX2756708
ERX2756710
ERX2756712
ERX2756713
ERX2756721
ERX2756724
ERX2756725
ERX2756729
ERX2756737
ERX2756738
ERX3581494
GSM3743501
GSM3743502
GSM3743503
GSM4942396
GSM4942397
GSM4942399
GSM5023319
ERX3581498
GSM4065391
GSM4942398
ERX2756711
ERX2756714
GSM4008666
GSM6574512
GSM6574531
GSM6574535
GSM6574544
GSM6634274
ERX3382888
ERX3382892
ERX3382894
ERX3382896
ERX3382902
ERX3806117
ERX3806118
ERX4012102
ERX4012105
GSM3486911
GSM3576406
GSM3576407
GSM3576408
GSM3576427
GSM3576428
GSM3576429
GSM3576430
GSM3576431
GSM4766839
GSM4766840
GSM4766846
ERX3382900
ERX4012106
GSM3576397
GSM3576398
GSM3576410
GSM3980132
GSM4008663
GSM5366691
GSM6588568
GSM6588569
ERX3382904
ERX3382910
ERX3620261
ERX3620262
ERX4012108
ERX4489140
ERX4577540
ERX4577543
ERX5085228
ERX5085229
ERX8792075
GSM3576409
GSM3960985
GSM4483692
GSM4483693
GSM4483694
GSM4766845
GSM4850586
GSM4850588
GSM5366688
GSM5366690
GSM6588567
ERX3382889
ERX3382893
ERX3382895
ERX3382897
ERX3382901
ERX3382903
ERX3382905
ERX3382909
ERX3382911
ERX4012101
ERX4012103
ERX4012107
ERX8791999
ERX8792102
GSM3576396
GSM3576426
GSM3980125
GSM3980131
GSM3980134
GSM3980140
GSM3980141
GSM4008647
GSM4008648
GSM4008662
GSM4008664
GSM5366689
ERX3382890
ERX3382898
ERX3382906
ERX3620264
ERX8791944
ERX8791947
ERX8791980
ERX8791993
ERX8792002
ERX8792031
ERX8792046
ERX8792049
ERX8792082
ERX8792085
ERX8792096
GSM4850583
ERX4012096
ERX4489138
ERX4577537
ERX4577538
ERX4577541
ERX4577542
ERX4577545
ERX4577546
GSM4808343
GSM4808347
ERX3382899
ERX3382907
GSM5804902
GSM3960983
GSM3960984
ERX3458563
ERX3458569
ERX3458571
ERX3458577
ERX3458579
ERX3458582
ERX3458585
ERX5053709
ERX5053710
ERX5053714
ERX5053717
ERX5053718
ERX5053722
GSM3892582
GSM4815804
ERX3458565
ERX3458573
ERX3458581
ERX3581438
ERX3581447
ERX3581464
ERX3581465
ERX3581474
ERX3581478
ERX3581489
ERX5053713
ERX5053721
GSM3667327
GSM3758115
GSM3892578
GSM3892579
GSM3892581
GSM4008710
GSM4567880
GSM4994382
GSM5264341
GSM5264342
GSM5264343
GSM5264344
GSM5264345
GSM5264346
GSM5420670
GSM5420671
GSM5420672
GSM5420673
GSM5420675
ERX3458566
ERX3458574
GSM3906044
GSM4142285
GSM4142286
GSM4142287
GSM4567877
GSM4567878
GSM3667328
GSM3667329
GSM3758116
GSM3758117
GSM3758118
GSM3758119
GSM3892577
GSM3892580
GSM4430462
GSM4430466
GSM4430467
GSM4430475
GSM4850587
GSM4994383
GSM4994384
GSM5277177
GSM4815805
GSM5277171
GSM5277173
GSM5277174
GSM5277175
GSM5494683
GSM5494688
GSM5494689
GSM5494690
GSM6111844
GSM6111845
GSM6111846
GSM6111847
GSM6111850
GSM6111851
GSM6111854
GSM6111855
GSM6284673
ERX3581434
ERX3581443
ERX3581491
ERX4127065
ERX4127066
GSM2741551
GSM2935201
GSM4008619
GSM4008620
GSM4008693
GSM4008694
GSM4008695
GSM4008696
GSM5225906
GSM6094653
GSM6094662
GSM6094663
GSM6094666
ERX3581440
GSM3073088
GSM3143601
GSM3300888
GSM3300889
GSM3509838
GSM3509839
GSM3509840
GSM3534656
GSM3534657
GSM3534658
GSM3534659
GSM5554503
GSM5554504
GSM5554509
GSM5554510
GSM5554513
GSM5554514
GSM5554515
GSM6094665
ERX3581441
ERX3581451
ERX8791976
GSM4008623
GSM4008626
GSM4008627
GSM5087737
GSM5087741
GSM5087743
GSM5616002
GSM5616003
GSM5616004
GSM5616006
GSM5764338
GSM5764341
GSM5764344
GSM5764346
GSM5764351
GSM5764354
GSM5764356
GSM5764358
GSM5764363
GSM5764366
GSM5764368
GSM5764370
GSM5764373
GSM5764377
GSM5764380
GSM5764384
GSM5764386
GSM5764387
GSM5764388
GSM5764389
GSM5764390
GSM5764391
GSM5764392
GSM6680887
ERX3581445
ERX3581449
ERX3581452
ERX3581454
ERX3581458
ERX3581460
ERX3581462
ERX3581463
ERX3581467
ERX3581468
ERX3581469
ERX3581472
ERX3581477
ERX3581481
ERX3581486
ERX3581487
ERX3581499
ERX3581500
ERX3581504
ERX3581508
ERX3581510
ERX3581512
ERX8792110
GSM3564836
GSM3564839
GSM3564842
GSM4008625
GSM4008697
GSM4008698
GSM4041153
GSM4041158
GSM4041160
GSM4735159
GSM4850582
GSM5226813
GSM5226814
GSM5226815
GSM6680898
ERX3581485
ERX3581503
ERX3581506
GSM3178782
GSM3178783
GSM3178784
GSM4041150
GSM4735156
GSM5325534
GSM5325535
GSM5615999
GSM5616000
GSM5616001
GSM5616005
GSM5616007
GSM5764383
GSM5764397
GSM5764398
GSM5764400
GSM5764401
GSM6680885
GSM6680886
GSM6680893
GSM5554497
GSM5554516
GSM6094652
GSM4735115
GSM5764375
GSM5764385
HC_1
HC_2
HC_3
GSM4008624
GSM4041155
GSM6680899
GSM4955424
GSM4735154
GSM5764361
GSM3178786
GSM4735157
GSM4735161
GSM5764393
ERX8792005
GSM6680884
GSM6680889
GSM6680894
GSM6680895
GSM6680900
GSM4955422
HC_4
GSM3073089
GSM4008621
GSM4008622
GSM5554499
GSM5554500
GSM5554501
GSM6094654
GSM5554545
GSM5554550
GSM5554554
GSM5554562
GSM5554566
GSM5982490
ERX3581496
ERX3581497
ERX8792061
GSM6680890
ERX3585521
ERX3585522
ERX3585523
ERX3585524
GSM5599220
GSM5599221
GSM5599222
GSM5599223
GSM5599224
GSM6574513
GSM6574538
GSM6574540
GSM6574545
ERX9230779
ERX9230780
ERX9230781
ERX9230782
ERX9230783
ERX9230784
ERX9230785
ERX9230789
ERX9230791
ERX9230795
ERX9230798
ERX9230806
ERX9230809
ERX9230812
GSM4257929
GSM4257930
ERX9230796
GSM4257928
GSM6244220
ERX4012061
ERX4012062
ERX4012063
ERX4012064
ERX4012065
ERX4012066
ERX4577539
ERX5085227
GSM4008690
GSM4008691
GSM4008692
GSM4808342
GSM4808344
GSM4808346
GSM4808348
ERX4012104
ERX8791938
GSM3214203
GSM3214206
GSM3214209
GSM4158911
GSM4158912
ERX4029225
ERX4029230
ERX4029231
ERX4029232
ERX8791941
GSM4008631
GSM4827167
GSM4827184
GSM4827199
GSM4827200
GSM4879379
GSM5068919
GSM5282544
GSM5282545
GSM5282546
GSM5282547
GSM5897133
GSM5897135
ERX4029234
GSM4008629
GSM4008630
GSM4008632
GSM4008633
GSM4008699
GSM4037301
GSM4037313
GSM5068923
GSM5282548
GSM5897134
GSM4081555
GSM5285695
GSM5285727
ERX4489139
ERX8791973
ERX8792025
GSM3891623
GSM3891624
GSM3891625
GSM3926546
GSM4008628
GSM4037302
GSM4037305
GSM4037306
GSM4037316
GSM4037323
GSM4037324
GSM4037325
GSM4475050
GSM4763859
GSM4827185
GSM5100070
GSM5226826
GSM5226829
GSM5226830
ERX4770806
ERX4770807
ERX4770809
ERX6124285
ERX6124286
ERX6124287
ERX6174476
ERX6174477
ERX6174478
ERX4770808
GSM5022599
GSM5022600
GSM5022601
GSM5022602
GSM5022603
GSM5022604
GSM5022605
GSM5022606
GSM5852274
ERX4809631
ERX4809632
ERX4809643
GSM3984199
GSM3984201
GSM3984202
GSM3984205
GSM3984208
GSM3984209
GSM3984211
GSM3984215
GSM3984216
GSM6119094
GSM6119096
GSM6119098
GSM6119099
GSM4430468
GSM4430470
GSM5277170
ERX5239480
ERX5239481
ERX5239482
GSM4850579
GSM4037309
GSM4763861
GSM5100069
ERX8792111
ERX8792112
GSM4876739
GSM4876742
GSM4876743
GSM5282543
GSM3891621
GSM3926545
GSM5226827
GSM5226828
GSM5068930
GSM5068932
GSM5068933
GSM5068936
GSM5226825
GSM4475048
GSM3906001
GSM3906002
GSM5764349
GSM6680892
GSM3891620
GSM4475049
GSM4504966
GSM4504967
GSM4876741
GSM6680891
GSM5764399
GSM4216703
ERX9230787
ERX9230788
ERX9230794
GSM4257926
GSM4257927
ERX9230815
ERX9230814
GSM6244218
GSM6244219
GSM5225907
GSM5554508
GSM5554511
GSM5554512
GSM5554549
GSM5554553
GSM5554557
GSM5764336
GSM3320197
GSM3823939
GSM3823940
GSM3823941
GSM4572192
GSM4572193
GSM4572194
GSM5554498
GSM5554502
GSM5554505
GSM5554506
GSM5554507
GSM5554542
GSM5554543
GSM5554544
GSM5554546
GSM5554555
GSM5554556
GSM5554564
GSM5554565
GSM5982489
GSM6094656
GSM6094659
GSM6094661
GSM6094664
GSM6433703
GSM6433704
GSM6433705
GSM6797221
GSM6797229
GSM6797231
GSM3529838
GSM3529850
GSM5967898
GSM5967905
GSM5967906
GSM5967908
GSM6720859
GSM6720861
GSM6720867
GSM6720882
GSM6720883
GSM6720886
GSM6720887
GSM3529840
GSM3529841
GSM3529842
GSM3529843
GSM3529845
GSM3529846
GSM3529847
GSM3529848
GSM3529849
GSM3529851
GSM4886743
GSM4886744
GSM4886746
GSM4886754
GSM4886757
GSM4886758
GSM4886759
GSM4886762
GSM4886763
GSM4886764
GSM4886765
GSM4886766
GSM4982083
GSM4982086
GSM4982087
GSM4982088
GSM4982091
GSM4982092
GSM4982096
GSM4982100
GSM4982101
GSM4982102
GSM4982106
GSM5292174
GSM5292175
GSM5292176
GSM5292177
GSM5292178
GSM5292179
GSM5292180
GSM5292181
GSM5292182
GSM5292183
GSM5292184
GSM5292185
GSM5292186
GSM5292187
GSM5292188
GSM5292193
GSM5292201
GSM5711863
GSM5711866
GSM5724021
GSM5724022
GSM5724023
GSM5836863
GSM5836864
GSM5836865
GSM5967900
GSM5967903
GSM6215859
GSM6215860
GSM6504776
GSM6504777
GSM6504778
GSM6504779
GSM6619552
GSM6619553
GSM6619556
GSM6619557
[truncated: 355 more rows]

## Sheet: cancer_tissue_cell_types
cancer	tissue	cellType
acute erythroid leukemia	blood	Granulocyte-monocyte progenitor
chronic myeloproliferative neoplasm	blood	Granulocyte-monocyte progenitor
acute erythroid leukemia	blood	Hematopoietic stem cell
acute myeloid leukemia	blood	Hematopoietic stem cell
chronic myeloproliferative neoplasm	blood	Hematopoietic stem cell
mixed-phenotype acute leukemia	blood	Hematopoietic stem cell
acute erythroid leukemia	blood	Red blood cell
childhood acute lymphoblastic leukemia	blood	Red blood cell
acute lymphoblastic leukemia	bone marrow	Naive CD4 T cell
acute myeloid leukemia	bone marrow	Naive CD4 T cell
multiple myeloma	bone marrow	Naive CD4 T cell
renal cell carcinoma	bone marrow	Naive CD4 T cell
acute lymphoblastic leukemia	bone marrow	Treg cell
acute myeloid leukemia	bone marrow	Treg cell
multiple myeloma	bone marrow	Treg cell
renal cell carcinoma	bone marrow	Treg cell
acute myeloid leukaemia	blood	CD16 monocyte
breast cancer	blood	CD16 monocyte
head and neck squamous cell carcinoma	blood	CD16 monocyte
nasopharyngeal carcinoma	blood	CD16 monocyte
non-Hodgkin lymphoma	blood	CD16 monocyte
ovarian cancer	blood	CD16 monocyte
pancreatic ductal adenocarcinoma	blood	CD16 monocyte
acute myeloid leukaemia	blood	Common lymphoid progenitor
childhood acute lymphoblastic leukemia	blood	Common lymphoid progenitor
mixed-phenotype acute leukemia	blood	Common lymphoid progenitor
acute myeloid leukaemia	blood	Cycling macrophage
acute myeloid leukaemia	blood	MHCII high CD14 monocyte
chronic lymphocytic leukemia	blood	MHCII high CD14 monocyte
glioblastoma	blood	MHCII high CD14 monocyte
non-Hodgkin lymphoma	blood	MHCII high CD14 monocyte
ovarian cancer	blood	MHCII high CD14 monocyte
pancreatic ductal adenocarcinoma	blood	MHCII high CD14 monocyte
acute myeloid leukaemia	blood	Mast cell
acute myeloid leukaemia	blood	cDC2
acute myeloid leukemia	blood	Memory CD4 T cell
breast cancer	blood	Memory CD4 T cell
cholangiocarcinoma	blood	Memory CD4 T cell
chronic lymphocytic leukemia	blood	Memory CD4 T cell
cutaneous T cell lymphoma	blood	Memory CD4 T cell
head and neck squamous cell carcinoma	blood	Memory CD4 T cell
melanoma	blood	Memory CD4 T cell
nasopharyngeal carcinoma	blood	Memory CD4 T cell
non-Hodgkin lymphoma	blood	Memory CD4 T cell
non-small cell lung cancer	blood	Memory CD4 T cell
ovarian cancer	blood	Memory CD4 T cell
pancreatic ductal adenocarcinoma	blood	Memory CD4 T cell
renal cell carcinoma	blood	Memory CD4 T cell
acute myeloid leukemia	blood	Naive CD4 T cell
breast cancer	blood	Naive CD4 T cell
childhood acute lymphoblastic leukemia	blood	Naive CD4 T cell
cholangiocarcinoma	blood	Naive CD4 T cell
chronic lymphocytic leukemia	blood	Naive CD4 T cell
cutaneous T cell lymphoma	blood	Naive CD4 T cell
glioblastoma	blood	Naive CD4 T cell
head and neck squamous cell carcinoma	blood	Naive CD4 T cell
melanoma	blood	Naive CD4 T cell
nasopharyngeal carcinoma	blood	Naive CD4 T cell
non-Hodgkin lymphoma	blood	Naive CD4 T cell
non-small cell lung cancer	blood	Naive CD4 T cell
ovarian cancer	blood	Naive CD4 T cell
pancreatic ductal adenocarcinoma	blood	Naive CD4 T cell
renal cell carcinoma	blood	Naive CD4 T cell
acute myeloid leukemia	blood	Treg cell
cutaneous T cell lymphoma	blood	Treg cell
head and neck squamous cell carcinoma	blood	Treg cell
melanoma	blood	Treg cell
nasopharyngeal carcinoma	blood	Treg cell
non-Hodgkin lymphoma	blood	Treg cell
renal cell carcinoma	blood	Treg cell
acute myeloid leukemia	bone marrow	B cell
multiple myeloma	bone marrow	B cell
acute myeloid leukemia	bone marrow	CD14 monocyte
multiple myeloma	bone marrow	CD14 monocyte
acute myeloid leukemia	bone marrow	CD16 NK cell
multiple myeloma	bone marrow	CD16 NK cell
acute myeloid leukemia	bone marrow	CD16 monocyte
multiple myeloma	bone marrow	CD16 monocyte
acute myeloid leukemia	bone marrow	CD4 T cell
acute myeloid leukemia	bone marrow	CD56 NK cell
multiple myeloma	bone marrow	CD56 NK cell
acute myeloid leukemia	bone marrow	Common dendritic progenitor
acute myeloid leukemia	bone marrow	Common lymphoid progenitor
mixed-phenotype acute leukemia	bone marrow	Common lymphoid progenitor
acute myeloid leukemia	bone marrow	Common myeloid progenitor
multiple myeloma	bone marrow	Common myeloid progenitor
acute myeloid leukemia	bone marrow	Cycling S100A+ preNeutrophil
multiple myeloma	bone marrow	Cycling S100A+ preNeutrophil
acute myeloid leukemia	bone marrow	Dendritic cell
multiple myeloma	bone marrow	Dendritic cell
acute myeloid leukemia	bone marrow	Early SOX4+ erythroblast
acute myeloid leukemia	bone marrow	GZMB CD8 T cell
mixed-phenotype acute leukemia	bone marrow	GZMB CD8 T cell
multiple myeloma	bone marrow	GZMB CD8 T cell
acute myeloid leukemia	bone marrow	GZMK CD8 T cell
multiple myeloma	bone marrow	GZMK CD8 T cell
acute myeloid leukemia	bone marrow	Granulocyte-monocyte progenitor
multiple myeloma	bone marrow	Granulocyte-monocyte progenitor
acute myeloid leukemia	bone marrow	Hematopoietic stem cell
chronic myelomonocytic leukemia	bone marrow	Hematopoietic stem cell
mixed-phenotype acute leukemia	bone marrow	Hematopoietic stem cell
multiple myeloma	bone marrow	Hematopoietic stem cell
acute myeloid leukemia	bone marrow	INF-activated T cell
multiple myeloma	bone marrow	INF-activated T cell
acute myeloid leukemia	bone marrow	Intermediate EPCAM+ erythroblast
multiple myeloma	bone marrow	Intermediate EPCAM+ erythroblast
acute myeloid leukemia	bone marrow	Lymphoid pre-pDC
multiple myeloma	bone marrow	Lymphoid pre-pDC
acute myeloid leukemia	bone marrow	MHCII high CD14 monocyte
multiple myeloma	bone marrow	MHCII high CD14 monocyte
acute myeloid leukemia	bone marrow	MHCII low CD14 monocyte
multiple myeloma	bone marrow	MHCII low CD14 monocyte
acute myeloid leukemia	bone marrow	Mast cell
acute myeloid leukemia	bone marrow	Megakaryocyte progenitor
acute myeloid leukemia	bone marrow	Megakaryocyte밻rythroid progenitor
acute myeloid leukemia	bone marrow	Memory B cell
multiple myeloma	bone marrow	Memory B cell
acute myeloid leukemia	bone marrow	Memory CD4 T cell
multiple myeloma	bone marrow	Memory CD4 T cell
acute myeloid leukemia	bone marrow	Memory CD8 T cell
multiple myeloma	bone marrow	Memory CD8 T cell
acute myeloid leukemia	bone marrow	Metamyelocyte/Band neutrophil
acute myeloid leukemia	bone marrow	Myelocyte
multiple myeloma	bone marrow	Myelocyte
acute myeloid leukemia	bone marrow	Naive B cell
multiple myeloma	bone marrow	Naive B cell
acute myeloid leukemia	bone marrow	Naive CD8 T cell
multiple myeloma	bone marrow	Naive CD8 T cell
acute myeloid leukemia	bone marrow	Placenta CAMP+ monocyte
acute myeloid leukemia	bone marrow	Placenta defensin+ monocyte
acute myeloid leukemia	bone marrow	Plasma cell
multiple myeloma	bone marrow	Plasma cell
smoldering multiple myeloma	bone marrow	Plasma cell
acute myeloid leukemia	bone marrow	Promyelocyte
acute myeloid leukemia	bone marrow	Red blood cell
multiple myeloma	bone marrow	Red blood cell
acute myeloid leukemia	bone marrow	S100A+ preNeutrophil
multiple myeloma	bone marrow	S100A+ preNeutrophil
acute myeloid leukemia	bone marrow	T cell
multiple myeloma	bone marrow	T cell
acute myeloid leukemia	bone marrow	Tissue-resident NK cell
acute myeloid leukemia	bone marrow	cDC2
multiple myeloma	bone marrow	cDC2
acute myeloid leukemia	bone marrow	pDC
multiple myeloma	bone marrow	pDC
anaplastic astrocytoma	brain	IL1RAPL1+ Leyding cell
glioblastoma	brain	IL1RAPL1+ Leyding cell
glioma	brain	IL1RAPL1+ Leyding cell
high-grade glioma	brain	IL1RAPL1+ Leyding cell
basal cell carcinoma	skin	Basal keratinocyte
cutaneous squamous cell carcinoma	skin	Basal keratinocyte
basal cell carcinoma	skin	Granular keratinocyte
basal cell carcinoma	skin	Melanocyte
cutaneous squamous cell carcinoma	skin	Melanocyte
bladder carcinoma	bladder	B cell
bladder carcinoma	bladder	CCL19+APOE+ fibroblast
bladder carcinoma	bladder	CD4 T cell
bladder carcinoma	bladder	Capillary EC
bladder carcinoma	bladder	FOS+ basal cell of bladder
bladder carcinoma	bladder	GZMK CD8 T cell
bladder carcinoma	bladder	Macrophage
bladder carcinoma	bladder	Mast cell
bladder carcinoma	bladder	Myofibroblast
bladder carcinoma	bladder	Plasma cell
bladder carcinoma	bladder	Treg cell
bladder carcinoma	bladder	Vascular smooth muscle cell
bladder carcinoma	bladder	Venous EC
breast cancer	blood	CD14 monocyte
cholangiocarcinoma	blood	CD14 monocyte
chronic lymphocytic leukemia	blood	CD14 monocyte
glioblastoma	blood	CD14 monocyte
head and neck squamous cell carcinoma	blood	CD14 monocyte
hepatocellular carcinoma	blood	CD14 monocyte
nasopharyngeal carcinoma	blood	CD14 monocyte
breast cancer	blood	CD16 NK cell
cholangiocarcinoma	blood	CD16 NK cell
chronic lymphocytic leukemia	blood	CD16 NK cell
glioblastoma	blood	CD16 NK cell
head and neck squamous cell carcinoma	blood	CD16 NK cell
nasopharyngeal carcinoma	blood	CD16 NK cell
non-Hodgkin lymphoma	blood	CD16 NK cell
ovarian cancer	blood	CD16 NK cell
pancreatic ductal adenocarcinoma	blood	CD16 NK cell
breast cancer	blood	GZMB CD8 T cell
cholangiocarcinoma	blood	GZMB CD8 T cell
chronic lymphocytic leukemia	blood	GZMB CD8 T cell
glioblastoma	blood	GZMB CD8 T cell
head and neck squamous cell carcinoma	blood	GZMB CD8 T cell
melanoma	blood	GZMB CD8 T cell
nasopharyngeal carcinoma	blood	GZMB CD8 T cell
non-Hodgkin lymphoma	blood	GZMB CD8 T cell
ovarian cancer	blood	GZMB CD8 T cell
pancreatic ductal adenocarcinoma	blood	GZMB CD8 T cell
breast cancer	blood	Naive B cell
childhood acute lymphoblastic leukemia	blood	Naive B cell
glioblastoma	blood	Naive B cell
head and neck squamous cell carcinoma	blood	Naive B cell
nasopharyngeal carcinoma	blood	Naive B cell
ovarian cancer	blood	Naive B cell
pancreatic ductal adenocarcinoma	blood	Naive B cell
breast cancer	breast	Arterial EC
breast cancer	breast	BNC2+ZFPM2+ fibroblast
breast cancer	breast	CD16 NK cell
breast cancer	breast	CDH19+LAMA2+ fibroblast
breast cancer	breast	CFD+MGP+ fibroblast
breast cancer	breast	CXCL14 mammary basal cell
breast cancer	breast	Capillary EC
breast cancer	breast	GZMB CD8 T cell
breast cancer	breast	GZMK+IL7R+ CD8 T cell
breast cancer	breast	KLRB1 CD8 T cell
breast cancer	breast	Macrophage
breast cancer	breast	Memory CD4 T cell
breast cancer	breast	PIP mammary luminal cell
breast cancer	breast	Pericyte
breast cancer	breast	SCGB3A1 mammary luminal progenitor
breast cancer	breast	Secretoglobin mammary luminal cell
breast cancer	breast	Secretory cell
breast cancer	breast	Vascular smooth muscle cell
breast cancer	breast	Venous EC
breast cancer	lymph node	B cell
cholangiocarcinoma	lymph node	B cell
chronic lymphocytic leukemia	lymph node	B cell
breast cancer	lymph node	CD4 T cell
cholangiocarcinoma	lymph node	CD4 T cell
breast cancer	lymph node	Memory CD4 T cell
cholangiocarcinoma	lymph node	Memory CD4 T cell
diffuse large B cell lymphoma	lymph node	Memory CD4 T cell
breast cancer	lymph node	Naive CD4 T cell
cholangiocarcinoma	lymph node	Naive CD4 T cell
breast cancer	lymph node	Treg cell
cholangiocarcinoma	lymph node	Treg cell
diffuse large B cell lymphoma	lymph node	Treg cell
childhood acute lymphoblastic leukemia	blood	Cycling preB cell
childhood acute lymphoblastic leukemia	blood	Naive CD8 T cell
chronic lymphocytic leukemia	blood	Naive CD8 T cell
melanoma	blood	Naive CD8 T cell
nasopharyngeal carcinoma	blood	Naive CD8 T cell
pancreatic ductal adenocarcinoma	blood	Naive CD8 T cell
childhood acute lymphoblastic leukemia	blood	ProB cell
cholangiocarcinoma	bile duct	CD4 T cell
cholangiocarcinoma	bile duct	Memory CD4 T cell
cholangiocarcinoma	bile duct	TFF1+ ductal cell
cholangiocarcinoma	bile duct	cDC2
cholangiocarcinoma	blood	GZMK CD8 T cell
chronic lymphocytic leukemia	blood	GZMK CD8 T cell
colorectal cancer	blood	GZMK CD8 T cell
glioblastoma	blood	GZMK CD8 T cell
head and neck squamous cell carcinoma	blood	GZMK CD8 T cell
melanoma	blood	GZMK CD8 T cell
nasopharyngeal carcinoma	blood	GZMK CD8 T cell
non-Hodgkin lymphoma	blood	GZMK CD8 T cell
ovarian cancer	blood	GZMK CD8 T cell
cholangiocarcinoma	liver	CXCL6+ cholangiocyte
hepatoblastoma	liver	CXCL6+ cholangiocyte
hepatocellular carcinoma	liver	CXCL6+ cholangiocyte
intrahepatic cholangiocarcinoma	liver	CXCL6+ cholangiocyte
cholangiocarcinoma	liver	Lymphatic EC
cholangiocarcinoma	liver	Macrophage
hepatocellular carcinoma	liver	Macrophage
intrahepatic cholangiocarcinoma	liver	Macrophage
cholangiocarcinoma	lymph node	GZMK CD8 T cell
chronic lymphocytic leukemia	lymph node	GZMK CD8 T cell
diffuse large B cell lymphoma	lymph node	GZMK CD8 T cell
chronic lymphocytic leukemia	blood	B cell
chronic lymphocytic leukemia	blood	Cycling T/NK cell
non-Hodgkin lymphoma	blood	Cycling T/NK cell
chronic lymphocytic leukemia	blood	Memory B cell
glioblastoma	blood	Memory B cell
nasopharyngeal carcinoma	blood	Memory B cell
chronic lymphocytic leukemia	lymph node	Memory B cell
clear cell renal cell carcinoma	kidney	AFP+ epithelial cell
clear cell renal cell carcinoma	kidney	Arterial EC
clear cell renal cell carcinoma	kidney	B cell
clear cell renal cell carcinoma	kidney	CD16 NK cell
clear cell renal cell carcinoma	kidney	CD16 monocyte
renal cell carcinoma	kidney	CD16 monocyte
clear cell renal cell carcinoma	kidney	Capillary EC
clear cell renal cell carcinoma	kidney	GZMK CD8 T cell
clear cell renal cell carcinoma	kidney	MT2A+ ductal cell
clear cell renal cell carcinoma	kidney	Macrophage
renal cell carcinoma	kidney	Macrophage
clear cell renal cell carcinoma	kidney	Mast cell
clear cell renal cell carcinoma	kidney	Mesothelial cell
clear cell renal cell carcinoma	kidney	NK cell
clear cell renal cell carcinoma	kidney	Ovarian cancer specific LGR5+MUC16+ epithelial cell
clear cell renal cell carcinoma	kidney	Pericyte
clear cell renal cell carcinoma	kidney	Renal epithelial cell (proximal tubule)
clear cell renal cell carcinoma	kidney	TUBA1A+ ductal cell
clear cell renal cell carcinoma	kidney	Vascular smooth muscle cell
clear cell renal cell carcinoma	kidney	Venous EC
clear cell renal cell carcinoma	kidney	cDC2
colorectal cancer	intestine	B cell
colorectal cancer	intestine	CD4 T cell
colorectal cancer	intestine	CFD+MGP+ fibroblast
colorectal cancer	intestine	Capillary EC
colorectal cancer	intestine	Cycling T/NK cell
colorectal cancer	intestine	G2/M phase surface mucous cell
colorectal cancer	intestine	GZMB CD8 T cell
colorectal cancer	intestine	GZMK CD8 T cell
colorectal cancer	intestine	Goblet cell
colorectal cancer	intestine	Macrophage
colorectal cancer	intestine	Myofibroblast
colorectal cancer	intestine	Naive CD4 T cell
colorectal cancer	intestine	Plasma cell
colorectal cancer	intestine	S phase surface mucous cell
colorectal cancer	intestine	Treg cell
cutaneous squamous cell carcinoma	skin	Cycling keratinocyte
cutaneous squamous cell carcinoma	skin	KRT14 basal cell
cutaneous squamous cell carcinoma	skin	Macrophage
cutaneous squamous cell carcinoma	skin	Monocyte
cutaneous squamous cell carcinoma	skin	Spinous keratinocyte
cutaneous squamous cell carcinoma	skin	Treg cell
cutaneous squamous cell carcinoma	skin	cDC2
cutaneous squamous cell carcinoma	skin	mregDC
ependymoma	brain	Neuron
glioblastoma	brain	Neuron
glioma	brain	Neuron
high-grade glioma	brain	Neuron
medulloblastoma	brain	Neuron
glioblastoma	brain	Oligodendrocyte progenitor cell
glioma	brain	Oligodendrocyte progenitor cell
high-grade glioma	brain	Oligodendrocyte progenitor cell
endometrial carcinoma	uterus	CLDN3+ epithelial cell
endometrial carcinoma	uterus	Capillary EC
fibroid tumor	uterus	Capillary EC
endometrial carcinoma	uterus	Cycling T/NK cell
endometrial carcinoma	uterus	GZMK+IL7R+ CD8 T cell
endometrial carcinoma	uterus	Macrophage
endometrial carcinoma	uterus	Memory CD4 T cell
endometrial carcinoma	uterus	NK cell
ependymoma	brain	Astrocyte
glioblastoma	brain	Astrocyte
glioma	brain	Astrocyte
ependymoma	brain	Fibrous astrocyte
high-grade glioma	brain	Fibrous astrocyte
ependymoma	brain	Macrophage
glioblastoma	brain	Macrophage
glioma	brain	Macrophage
high-grade glioma	brain	Macrophage
medulloblastoma	brain	Macrophage
ependymoma	brain	Monocyte
extrahepatic cholangiocarcinoma	liver	M1 macrophage
hepatoblastoma	liver	M1 macrophage
hepatocellular carcinoma	liver	M1 macrophage
fibroid tumor	uterus	Arterial EC
fibroid tumor	uterus	CD16 NK cell
fibroid tumor	uterus	Fetal KCNQ1OT1+MIR503HG+ fibroblast
fibroid tumor	uterus	LYVE1 macrophage
fibroid tumor	uterus	Lymphatic EC
fibroid tumor	uterus	Venous EC
gastric cancer	stomach	B cell
gastrointestinal stromal tumor	stomach	B cell
gastric cancer	stomach	CD4 T cell
gastrointestinal stromal tumor	stomach	CD4 T cell
gastric cancer	stomach	GZMB CD8 T cell
gastric cancer	stomach	Plasma cell
gastrointestinal stromal tumor	stomach	GPC3+ fibroblast
glioblastoma	blood	MHCII low CD14 monocyte
non-Hodgkin lymphoma	blood	MHCII low CD14 monocyte
ovarian cancer	blood	MHCII low CD14 monocyte
glioblastoma	brain	Cycling macrophage
glioblastoma	brain	LYVE1 macrophage
glioma	brain	LYVE1 macrophage
high-grade glioma	brain	LYVE1 macrophage
glioblastoma	brain	Microglia
glioma	brain	Microglia
high-grade glioma	brain	Microglia
glioblastoma	brain	Oligodendrocyte
glioma	brain	Oligodendrocyte
high-grade glioma	brain	Oligodendrocyte
glioblastoma	brain	Pericyte
high-grade glioma	brain	Pericyte
glioma	brain	Arterial EC
high-grade glioma	brain	Arterial EC
head and neck squamous cell carcinoma	blood	MAIT cell
melanoma	blood	MAIT cell
nasopharyngeal carcinoma	blood	MAIT cell
ovarian cancer	blood	MAIT cell
head and neck squamous cell carcinoma	mouth	CD4 T cell
head and neck squamous cell carcinoma	mouth	GZMB CD8 T cell
oral cancer	mouth	GZMB CD8 T cell
head and neck squamous cell carcinoma	tonsil	B cell
head and neck squamous cell carcinoma	tonsil	CD4 T cell
head and neck squamous cell carcinoma	tonsil	Memory CD8 T cell
head and neck squamous cell carcinoma	tonsil	Treg cell
hepatoblastoma	liver	AFP+ fetal hepatocyte
hepatocellular carcinoma	liver	AFP+ fetal hepatocyte
hepatoblastoma	liver	Hepatocyte
hepatocellular carcinoma	liver	Hepatocyte
hepatoblastoma	liver	Venous EC
hepatocellular carcinoma	liver	Venous EC
hepatocellular carcinoma	blood	T cell
pancreatic ductal adenocarcinoma	blood	T cell
hepatocellular carcinoma	liver	Adipocyte
hepatocellular carcinoma	liver	Arterial EC
hepatocellular carcinoma	liver	B cell
intrahepatic cholangiocarcinoma	liver	B cell
hepatocellular carcinoma	liver	CD16 NK cell
intrahepatic cholangiocarcinoma	liver	CD16 NK cell
hepatocellular carcinoma	liver	CD16 monocyte
intrahepatic cholangiocarcinoma	liver	CD16 monocyte
hepatocellular carcinoma	liver	CD4 T cell
intrahepatic cholangiocarcinoma	liver	CD4 T cell
hepatocellular carcinoma	liver	CD56 NK cell
intrahepatic cholangiocarcinoma	liver	CD56 NK cell
hepatocellular carcinoma	liver	CD8 T cell
intrahepatic cholangiocarcinoma	liver	CD8 T cell
hepatocellular carcinoma	liver	CFD+MGP+ fibroblast
hepatocellular carcinoma	liver	Capillary EC
intrahepatic cholangiocarcinoma	liver	Capillary EC
hepatocellular carcinoma	liver	Cycling T/NK cell
intrahepatic cholangiocarcinoma	liver	Cycling T/NK cell
hepatocellular carcinoma	liver	GZMB CD8 T cell
intrahepatic cholangiocarcinoma	liver	GZMB CD8 T cell
hepatocellular carcinoma	liver	GZMK CD8 T cell
intrahepatic cholangiocarcinoma	liver	GZMK CD8 T cell
hepatocellular carcinoma	liver	GZMK+IL7R- CD8 T cell
hepatocellular carcinoma	liver	ILC
hepatocellular carcinoma	liver	INF-activated T cell
hepatocellular carcinoma	liver	LYVE1 macrophage
intrahepatic cholangiocarcinoma	liver	LYVE1 macrophage
hepatocellular carcinoma	liver	MAIT cell
intrahepatic cholangiocarcinoma	liver	MAIT cell
hepatocellular carcinoma	liver	MHCII high CD14 monocyte
hepatocellular carcinoma	liver	Memory CD4 T cell
intrahepatic cholangiocarcinoma	liver	Memory CD4 T cell
hepatocellular carcinoma	liver	Monocyte
intrahepatic cholangiocarcinoma	liver	Monocyte
hepatocellular carcinoma	liver	NK cell
intrahepatic cholangiocarcinoma	liver	NK cell
hepatocellular carcinoma	liver	Naive CD4 T cell
intrahepatic cholangiocarcinoma	liver	Naive CD4 T cell
hepatocellular carcinoma	liver	Naive CD8 T cell
intrahepatic cholangiocarcinoma	liver	Naive CD8 T cell
hepatocellular carcinoma	liver	Plasma cell
intrahepatic cholangiocarcinoma	liver	Plasma cell
hepatocellular carcinoma	liver	T cell
hepatocellular carcinoma	liver	cDC2
intrahepatic cholangiocarcinoma	liver	cDC2
high-grade glioma	brain	CXCL14 inhibitory neuron
medulloblastoma	brain	CXCL14 inhibitory neuron
high-grade glioma	brain	G2/M phase glial cell
high-grade glioma	brain	L2/3 excitatory neuron
high-grade glioma	brain	Primordial germ cell
high-grade glioma	brain	T cell
high-grade serous ovarian cancer	fallopian tube	Ovarian cancer enriched S100A9+MUC16+ epithelial cell
high-grade serous ovarian cancer	ovary	BNC2+ZFPM2+ fibroblast
high-grade serous ovarian cancer	ovary	CD8 T cell
high-grade serous ovarian cancer	ovary	CLDN3+ epithelial cell
high-grade serous ovarian cancer	ovary	Capillary EC
high-grade serous ovarian cancer	ovary	IL1RAPL1+ Leyding cell
high-grade serous ovarian cancer	ovary	Macrophage
ovarian adenocarcinoma	ovary	Macrophage
high-grade serous ovarian cancer	ovary	Memory CD4 T cell
high-grade serous ovarian cancer	ovary	Mesothelial cell
high-grade serous ovarian cancer	ovary	Monocyte
high-grade serous ovarian cancer	ovary	Pericyte
high-grade serous ovarian cancer	ovary	Vascular smooth muscle cell
high-grade serous ovarian cancer	ovary	Venous EC
intrahepatic cholangiocarcinoma	blood	Neutrophil
non-Hodgkin lymphoma	blood	Neutrophil
intrahepatic cholangiocarcinoma	liver	CD14 monocyte
intrahepatic cholangiocarcinoma	liver	CD14/CD16 monocyte
intrahepatic cholangiocarcinoma	liver	Dendritic cell
intrahepatic cholangiocarcinoma	liver	GZMK+IL7R+ CD8 T cell
intrahepatic cholangiocarcinoma	liver	Memory B cell
intrahepatic cholangiocarcinoma	liver	Neutrophil
lung adenocarcinoma	pleura	Mesothelial cell
lung cancer	lung	GZMB CD8 T cell
lung carcinoma	lung	GZMB CD8 T cell
lung cancer	lung	GZMK CD8 T cell
non-small cell lung cancer	lung	GZMK CD8 T cell
lung cancer	lung	GZMK+IL7R+ CD8 T cell
lung carcinoma	lung	Alveolar macrophage
non-small cell lung cancer	lung	Alveolar macrophage
lung carcinoma	lung	B cell
lung carcinoma	lung	CD16 NK cell
lung carcinoma	lung	CD4 T cell
non-small cell lung cancer	lung	CD4 T cell
lung carcinoma	lung	MHCII high CD14 monocyte
lung carcinoma	lung	Macrophage
lung carcinoma	lung	Naive CD4 T cell
non-small cell lung cancer	lung	Naive CD4 T cell
melanoma	blood	Gamma delta T cell
nasopharyngeal carcinoma	blood	Gamma delta T cell
melanoma	cerebrospinal fluid	GZMB CD8 T cell
melanoma	cerebrospinal fluid	GZMK CD8 T cell
melanoma	cerebrospinal fluid	Memory CD4 T cell
melanoma	cerebrospinal fluid	Treg cell
melanoma	skin	CD8 T cell
multiple myeloma	bone marrow	CD8 T cell
multiple myeloma	bone marrow	Cycling late hemoglobin+ erythroblast
multiple myeloma	bone marrow	Cycling macrophage
multiple myeloma	bone marrow	Cycling preB cell
multiple myeloma	bone marrow	Fetal HBG+ erythrocyte
multiple myeloma	bone marrow	GZMK+IL7R- CD8 T cell
multiple myeloma	bone marrow	Gamma delta T cell
multiple myeloma	bone marrow	Late hemoglobin+ erythroblast
multiple myeloma	bone marrow	NK cell
multiple myeloma	bone marrow	Neutrophil
multiple myeloma	bone marrow	PreB cell
nasopharyngeal carcinoma	blood	CD56 NK cell
nasopharyngeal carcinoma	nasopharynx	B cell
nasopharyngeal carcinoma	nasopharynx	CD4 T cell
nasopharyngeal carcinoma	nasopharynx	GZMK CD8 T cell
nasopharyngeal carcinoma	nasopharynx	Memory B cell
nasopharyngeal carcinoma	nasopharynx	Naive B cell
nasopharyngeal carcinoma	nasopharynx	Naive CD4 T cell
nasopharyngeal carcinoma	nasopharynx	Naive CD8 T cell
nasopharyngeal carcinoma	nasopharynx	Plasma cell
neuroblastoma	adrenal gland	Chromaffin cell
neuroblastoma	adrenal gland	Common lymphoid progenitor
neuroblastoma	adrenal gland	Glial cell
neuroblastoma	adrenal gland	LYVE1 macrophage
neuroblastoma	adrenal gland	MHCII high CD14 monocyte
neuroblastoma	adrenal gland	Macrophage
neuroblastoma	adrenal gland	Monocyte
neuroblastoma	adrenal gland	T/NK cell
non-Hodgkin lymphoma	blood	Metamyelocyte/Band neutrophil
non-Hodgkin lymphoma	blood	Placenta CAMP+ monocyte
non-small cell lung cancer	lung	CD8 T cell
non-small cell lung cancer	lung	M1 macrophage
non-small cell lung cancer	lung	Memory CD4 T cell
non-small cell lung cancer	lung	Monocyte
non-small cell lung cancer	lung	cDC2
oral cancer	mouth	B cell
oral cancer	mouth	CCL19+APOE+ fibroblast
oral cancer	mouth	Capillary EC
oral cancer	mouth	GZMK CD8 T cell
oral cancer	mouth	KRT14 basal cell
oral cancer	mouth	Macrophage
osteosarcoma	bone	Capillary EC
osteosarcoma	bone	Fibroblast
osteosarcoma	bone	G2/M phase GPC3+ fibroblast
osteosarcoma	bone	Memory CD4 T cell
osteosarcoma	bone	Monocyte
osteosarcoma	bone	Myofibroblast
ovarian adenocarcinoma	ovary	Cycling mesothelial cell
ovarian adenocarcinoma	ovary	G2/M phase GPC3+ fibroblast
ovarian adenocarcinoma	ovary	GPC3+ fibroblast
pancreatic cancer	pancreas	Acinar cell
pancreatic ductal adenocarcinoma	pancreas	Acinar cell
pancreatic cancer	pancreas	Capillary EC
pancreatic ductal adenocarcinoma	pancreas	Capillary EC
pancreatic cancer	pancreas	KLRB1 CD8 T cell
pancreatic ductal adenocarcinoma	pancreas	KLRB1 CD8 T cell
pancreatic cancer	pancreas	Pericyte
pancreatic ductal adenocarcinoma	pancreas	Pericyte
pancreatic cancer	pancreas	TUBA1A+ ductal cell
pancreatic ductal adenocarcinoma	blood	CD4 T cell
pancreatic ductal adenocarcinoma	pancreas	BNC2+ZFPM2+ fibroblast
pancreatic ductal adenocarcinoma	pancreas	CDH19+LAMA2+ fibroblast
pancreatic ductal adenocarcinoma	pancreas	Endocrine cell
pancreatic ductal adenocarcinoma	pancreas	G2/M phase GPC3+ fibroblast
pancreatic ductal adenocarcinoma	pancreas	Macrophage
pancreatic ductal adenocarcinoma	pancreas	Naive B cell
pancreatic ductal adenocarcinoma	pancreas	Pancreatic ductal cell
pancreatic ductal adenocarcinoma	pancreas	Vascular smooth muscle cell
pancreatic ductal adenocarcinoma	pancreas	Venous EC
prostate cancer	prostate	CD14 monocyte
prostate cancer	prostate	FOS+ basal cell of bladder
prostate cancer	prostate	GZMB CD8 T cell
prostate cancer	prostate	GZMK CD8 T cell
prostate cancer	prostate	GZMK+IL7R+ CD8 T cell
prostate cancer	prostate	KLRB1 CD8 T cell
prostate cancer	prostate	Macrophage
prostate cancer	prostate	Memory CD4 T cell
prostate cancer	prostate	Naive B cell
prostate cancer	prostate	Naive CD4 T cell
prostate cancer	prostate	Secretory cell
prostate cancer	prostate	Treg cell
prostate cancer	prostate	Vascular smooth muscle cell
prostate cancer	prostate	Venous EC
renal cell carcinoma	kidney	CD14 monocyte
retinoblastoma	eye	CFD+MGP+ fibroblast
retinoblastoma	eye	Cone cell
retinoblastoma	eye	Merkel cell
retinoblastoma	eye	S phase GPC3+ fibroblast
thyroid carcinoma	thyroid	B cell
thyroid carcinoma	thyroid	Naive CD4 T cell
uveal melanoma	eye	Melanocyte
