# Supplementary material for: scCDX: enhancing cancer driver gene identification and model interpretability with single-cell RNA sequencing data and extreme gradient boosting
Source: Research Square preprint supplement (doi:10.21203/rs.3.rs-4222777/v1), 2024-04-11
Supplement: Supplementary file 3 [file 5c72ae97926ab570ad5a9b6d.xlsx]

## Sheet: HCC_Cycling TNK
Term name	Adjusted p-value	P-value
Pathways in cancer	8.19698e-34	3.30523e-36
PI3K-Akt signaling pathway	5.51441e-19	4.4471e-21
Human T-cell leukemia virus 1 infection	6.58313e-19	7.96346e-21
Hepatitis B	2.63604e-18	4.25168e-20
Human papillomavirus infection	5.1972e-18	1.04782e-19
Focal adhesion	1.35468e-16	3.27746e-18
Epstein-Barr virus infection	1.16708e-15	3.29419e-17
Cell cycle	1.5952e-15	5.14581e-17
Transcriptional misregulation in cancer	1.78502e-15	6.47789e-17
T cell receptor signaling pathway	2.64929e-15	1.06826e-16
Cellular senescence	3.78341e-15	1.67813e-16
Chronic myeloid leukemia	5.83318e-15	2.82251e-16
Salmonella infection	3.69684e-14	1.93786e-15
Th17 cell differentiation	4.547e-14	2.56686e-15
Human immunodeficiency virus 1 infection	1.31889e-13	7.97719e-15
Hepatocellular carcinoma	1.56029e-13	1.00664e-14
Lipid and atherosclerosis	1.69223e-13	1.16e-14
Viral carcinogenesis	2.60769e-13	1.89268e-14
Proteoglycans in cancer	3.18112e-13	2.43715e-14
Kaposi sarcoma-associated herpesvirus infection	4.87763e-13	3.93357e-14
Prostate cancer	5.37579e-13	4.55208e-14
Colorectal cancer	5.83894e-13	5.17971e-14
Yersinia infection	6.42081e-13	5.95478e-14
Acute myeloid leukemia	9.93258e-13	9.61217e-14
Osteoclast differentiation	1.07365e-12	1.08231e-13
Human cytomegalovirus infection	2.48498e-12	2.60522e-13
Measles	6.72948e-12	7.32645e-13
AGE-RAGE signaling pathway in diabetic complications	8.30589e-12	9.37762e-13
Relaxin signaling pathway	1.19256e-11	1.39453e-12
Endometrial cancer	1.69771e-11	2.05369e-12
Prolactin signaling pathway	2.3845e-11	2.98063e-12
Non-small cell lung cancer	3.67159e-11	4.74592e-12
MicroRNAs in cancer	3.67159e-11	4.88559e-12
Pancreatic cancer	8.38232e-11	1.14919e-11
PD-L1 expression and PD-1 checkpoint pathway in cancer	9.69205e-11	1.36783e-11
FoxO signaling pathway	1.11972e-10	1.6254e-11
C-type lectin receptor signaling pathway	1.27287e-10	1.95036e-11
NF-kappa B signaling pathway	1.27287e-10	1.95036e-11
Small cell lung cancer	1.51984e-10	2.39008e-11
Renal cell carcinoma	1.93167e-10	3.1156e-11
Chemokine signaling pathway	4.82537e-10	7.97743e-11
MAPK signaling pathway	9.99057e-10	1.69195e-10
Regulation of actin cytoskeleton	1.05139e-09	1.82297e-10
Th1 and Th2 cell differentiation	1.35306e-09	2.40059e-10
B cell receptor signaling pathway	1.9241e-09	3.4913e-10
Hepatitis C	2.48229e-09	4.60425e-10
Toxoplasmosis	3.17338e-09	6.01407e-10
ErbB signaling pathway	3.66693e-09	7.09728e-10
Breast cancer	4.96284e-09	9.80561e-10
Gastric cancer	6.13469e-09	1.23683e-09
Fanconi anemia pathway	1.11136e-08	2.28545e-09
Fc epsilon RI signaling pathway	1.67692e-08	3.51613e-09
Apoptosis	1.74315e-08	3.72528e-09
Thyroid cancer	2.97814e-08	6.48467e-09
VEGF signaling pathway	3.0358e-08	6.73263e-09
Growth hormone synthesis, secretion and action	5.1834e-08	1.17045e-08
Toll-like receptor signaling pathway	5.52948e-08	1.27089e-08
Influenza A	5.91944e-08	1.38439e-08
Thyroid hormone signaling pathway	6.27625e-08	1.49314e-08
Bladder cancer	7.9548e-08	1.92455e-08
Pathogenic Escherichia coli infection	9.93618e-08	2.44398e-08
Leukocyte transendothelial migration	1.80607e-07	4.51518e-08
Shigellosis	1.93707e-07	4.92077e-08
Longevity regulating pathway	2.8672e-07	7.39922e-08
Neurotrophin signaling pathway	3.08551e-07	8.08703e-08
Insulin signaling pathway	3.33292e-07	8.86987e-08
Fluid shear stress and atherosclerosis	4.02665e-07	1.08784e-07
Chemical carcinogenesis	4.89157e-07	1.34124e-07
Signaling pathways regulating pluripotency of stem cells	5.81676e-07	1.61837e-07
JAK-STAT signaling pathway	6.03503e-07	1.70344e-07
Hippo signaling pathway	6.50655e-07	1.86276e-07
TNF signaling pathway	8.38132e-07	2.43329e-07
mTOR signaling pathway	1.52872e-06	4.49987e-07
Central carbon metabolism in cancer	1.55288e-06	4.63361e-07
Cushing syndrome	1.62527e-06	4.91513e-07
ECM-receptor interaction	2.2266e-06	6.82345e-07
Glioma	3.05167e-06	9.47496e-07
Amyotrophic lateral sclerosis	3.1116e-06	9.78647e-07
Wnt signaling pathway	3.88903e-06	1.23884e-06
IL-17 signaling pathway	4.32133e-06	1.40363e-06
Phospholipase D signaling pathway	4.32133e-06	1.4114e-06
Ras signaling pathway	4.66327e-06	1.54189e-06
Choline metabolism in cancer	6.57479e-06	2.20043e-06
Progesterone-mediated oocyte maturation	8.06471e-06	2.7316e-06
Apelin signaling pathway	8.3641e-06	2.86673e-06
Homologous recombination	9.3089e-06	3.22809e-06
Chagas disease	9.61428e-06	3.37275e-06
Alzheimer disease	1.16788e-05	4.14411e-06
Pathways of neurodegeneration	1.23261e-05	4.42348e-06
Melanoma	1.35527e-05	4.91832e-06
Endocytosis	1.42e-05	5.21047e-06
p53 signaling pathway	1.50558e-05	5.58522e-06
Tight junction	1.9628e-05	7.36051e-06
Autophagy	3.79789e-05	1.45484e-05
Estrogen signaling pathway	3.79789e-05	1.45484e-05
Diabetic cardiomyopathy	4.2888e-05	1.66018e-05
Ubiquitin mediated proteolysis	4.69674e-05	1.83703e-05
RIG-I-like receptor signaling pathway	7.01325e-05	2.77137e-05
Adherens junction	7.79304e-05	3.11093e-05
Natural killer cell mediated cytotoxicity	0.000108821	4.38794e-05
Fc gamma R-mediated phagocytosis	0.000171252	6.97437e-05
Base excision repair	0.000209284	8.60765e-05
Rap1 signaling pathway	0.000225452	9.36352e-05
Amoebiasis	0.000254783	0.000106845
Platelet activation	0.000286321	0.000121224
Mismatch repair	0.000327604	0.000140024
DNA replication	0.000331277	0.00014293
Parathyroid hormone synthesis, secretion and action	0.000338608	0.000147458
Non-homologous end-joining	0.000359176	0.000157864
Oocyte meiosis	0.000388678	0.000172398
Epithelial cell signaling in Helicobacter pylori infection	0.000401704	0.000179795
HIF-1 signaling pathway	0.000411517	0.000185846
Huntington disease	0.00050772	0.00023134
GnRH signaling pathway	0.000563982	0.00025925
Axon guidance	0.000583645	0.000270642
TGF-beta signaling pathway	0.00060089	0.000281061
Legionellosis	0.000615494	0.000290374
RNA transport	0.00070238	0.000334197
Bacterial invasion of epithelial cells	0.000727744	0.0003492
Sphingolipid signaling pathway	0.0007846	0.000379645
GnRH secretion	0.00122089	0.000595678
Nucleotide excision repair	0.00129846	0.000638757
Inflammatory bowel disease	0.00132018	0.000654768
Gap junction	0.00171922	0.000859612
Coronavirus disease	0.00173076	0.000872358
NOD-like receptor signaling pathway	0.00175797	0.000893161
Adipocytokine signaling pathway	0.00183391	0.000939139
Cholinergic synapse	0.00209749	0.00108257
Dilated cardiomyopathy	0.00291523	0.00151639
AMPK signaling pathway	0.00315014	0.00165128
Leishmaniasis	0.00339576	0.00179373
Protein processing in endoplasmic reticulum	0.00345214	0.00183743
Melanogenesis	0.00390854	0.00209611
Thermogenesis	0.00469666	0.00253771
Oxytocin signaling pathway	0.00500337	0.0027253
Tuberculosis	0.00500337	0.00274378
Basal transcription factors	0.00611841	0.00337993
Necroptosis	0.00616358	0.00342973
cAMP signaling pathway	0.00699009	0.00391783
Neutrophil extracellular trap formation	0.00705163	0.00398076
Hypertrophic cardiomyopathy	0.00763384	0.00434021
Mitophagy	0.00763915	0.00437403
cGMP-PKG signaling pathway	0.0084116	0.00485024
Endocrine and other factor-regulated calcium reabsorption	0.0118016	0.00685256
Hedgehog signaling pathway	0.014766	0.00863337
Protein digestion and absorption	0.0152461	0.00897555
Prion disease	0.0163899	0.00971497
One carbon pool by folate	0.0165558	0.00988008
Dopaminergic synapse	0.0174135	0.0104621
Insulin resistance	0.0189852	0.011483
Basal cell carcinoma	0.022808	0.0139791
Lysine degradation	0.022808	0.0139791
Long-term potentiation	0.028947	0.0178584
Herpes simplex virus 1 infection	0.0312926	0.0194317
Type II diabetes mellitus	0.0320635	0.0200397
Spliceosome	0.0335793	0.0211225
Non-alcoholic fatty liver disease	0.0396557	0.0251046
Parkinson disease	0.0424726	0.0270592
Thyroid hormone synthesis	0.0430588	0.0276062
Ovarian steroidogenesis	0.0435841	0.0281188
Arrhythmogenic right ventricular cardiomyopathy	0.0469519	0.0304809
Vascular smooth muscle contraction	0.048666	0.0319113
Antigen processing and presentation	0.048666	0.0319861
Regulation of lipolysis in adipocytes	0.0541255	0.0357927
Serotonergic synapse	0.0656171	0.0436565
Spinocerebellar ataxia	0.0663847	0.0444349
Long-term depression	0.0696839	0.0469242
Aldosterone-regulated sodium reabsorption	0.0750639	0.0508497
Cytosolic DNA-sensing pathway	0.0798647	0.0544239
Adrenergic signaling in cardiomyocytes	0.0800251	0.0548559
Phagosome	0.0842485	0.0580907
Alcoholism	0.0890124	0.0617344
Inflammatory mediator regulation of TRP channels	0.103094	0.0719163
Vasopressin-regulated water reabsorption	0.110239	0.0773449
Inositol phosphate metabolism	0.118694	0.0837557
Pertussis	0.132173	0.0938005
Cysteine and methionine metabolism	0.145437	0.103909
RNA degradation	0.145437	0.104386
Citrate cycle (TCA cycle)	0.204118	0.147327
Notch signaling pathway	0.205691	0.149292
Circadian rhythm	0.212717	0.155249
Lysosome	0.225439	0.165443
Cortisol synthesis and secretion	0.247281	0.182469
Hematopoietic cell lineage	0.251903	0.186896
Primary immunodeficiency	0.284883	0.212513
Ubiquinone and other terpenoid-quinone biosynthesis	0.297088	0.222816
Cytokine-cytokine receptor interaction	0.301489	0.227332
Ferroptosis	0.31351	0.237661
Retrograde endocannabinoid signaling	0.3212	0.245126
Tryptophan metabolism	0.3212	0.246081
Glutamatergic synapse	0.335334	0.258776
Synaptic vesicle cycle	0.335334	0.259613
Carbohydrate digestion and absorption	0.37039	0.288247
Intestinal immune network for IgA production	0.379239	0.296663
Cholesterol metabolism	0.398637	0.313444
Cardiac muscle contraction	0.398846	0.315217
GABAergic synapse	0.412468	0.327646
Bile secretion	0.41746	0.33386
Purine metabolism	0.41746	0.334978
Fatty acid biosynthesis	0.419182	0.33805
Morphine addiction	0.419591	0.340072
Pyrimidine metabolism	0.445854	0.363155
Circadian entrainment	0.458565	0.377207
Phosphatidylinositol signaling system	0.458565	0.377207
Steroid hormone biosynthesis	0.488162	0.403521
Protein export	0.490925	0.409764
Renin-angiotensin system	0.490925	0.409764
Calcium signaling pathway	0.549621	0.461373
Amphetamine addiction	0.549621	0.465405
Renin secretion	0.549621	0.465405
Phototransduction	0.556794	0.473724
Ascorbate and aldarate metabolism	0.58178	0.497328
Asthma	0.589557	0.50873
RNA polymerase	0.589557	0.50873
Gastric acid secretion	0.592822	0.516329
Metabolism of xenobiotics by cytochrome P450	0.592822	0.516329
Pentose and glucuronate interconversions	0.618757	0.541413
African trypanosomiasis	0.650631	0.571925
Complement and coagulation cascades	0.653299	0.576905
Various types of N-glycan biosynthesis	0.666368	0.591133
Rheumatoid arthritis	0.702414	0.625942
ABC transporters	0.719142	0.643748
Aldosterone synthesis and secretion	0.721929	0.654289
mRNA surveillance pathway	0.721929	0.654289
Cell adhesion molecules	0.721929	0.654975
Pyruvate metabolism	0.723962	0.659739
Viral protein interaction with cytokine and cytokine receptor	0.726671	0.665138
Cocaine addiction	0.732613	0.675014
Malaria	0.732613	0.682393
N-Glycan biosynthesis	0.732613	0.682393
Vibrio cholerae infection	0.732613	0.682393
Glucagon signaling pathway	0.744855	0.700961
Autoimmune thyroid disease	0.744855	0.703542
Glycosaminoglycan biosynthesis	0.744855	0.703542
Ribosome biogenesis in eukaryotes	0.744855	0.70581
Viral myocarditis	0.785597	0.747584
Neuroactive ligand-receptor interaction	0.823172	0.787633
Retinol metabolism	0.823172	0.78998
Systemic lupus erythematosus	0.844278	0.813677
PPAR signaling pathway	0.844278	0.817043
Peroxisome	0.872417	0.847792
Insulin secretion	0.878894	0.861174
Taste transduction	0.878894	0.861174
Salivary secretion	0.896286	0.88183
Pancreatic secretion	0.915014	0.903946
Drug metabolism	0.923793	0.916343
Oxidative phosphorylation	0.956842	0.952984
Olfactory transduction	0.999959	0.999959

## Sheet: Prostate cancer_Macrophage
Term name	Adjusted p-value	P-value
Pathways in cancer	6.04034e-14	3.03535e-16
Transcriptional misregulation in cancer	1.03715e-08	1.04236e-10
Prostate cancer	2.43933e-05	3.67739e-07
PI3K-Akt signaling pathway	4.23485e-05	8.51227e-07
Small cell lung cancer	0.000177587	4.72467e-06
IL-17 signaling pathway	0.000177587	5.35437e-06
Human T-cell leukemia virus 1 infection	0.000256551	9.02441e-06
Relaxin signaling pathway	0.000815635	3.27894e-05
Fluid shear stress and atherosclerosis	0.0011023	4.98528e-05
ECM-receptor interaction	0.00118035	5.93139e-05
cAMP signaling pathway	0.00129953	7.18333e-05
Cellular senescence	0.00156861	9.45893e-05
Amoebiasis	0.00183314	0.000119753
Th17 cell differentiation	0.00213287	0.000150051
Toxoplasmosis	0.00246618	0.000185893
Cell cycle	0.00371237	0.000298482
Adherens junction	0.00409045	0.000349435
Focal adhesion	0.0041311	0.000373667
Cytokine-cytokine receptor interaction	0.00507436	0.000484487
Lipid and atherosclerosis	0.00531042	0.00053371
Gastric cancer	0.00655258	0.000691478
Hypertrophic cardiomyopathy	0.0077663	0.000858586
Bladder cancer	0.00791015	0.000941668
Human papillomavirus infection	0.00791015	0.000953988
Hippo signaling pathway	0.00823949	0.00103511
cGMP-PKG signaling pathway	0.00882632	0.00115319
AGE-RAGE signaling pathway in diabetic complications	0.00903601	0.0012714
Viral protein interaction with cytokine and cytokine receptor	0.00903601	0.0012714
Malaria	0.0108407	0.00167936
Axon guidance	0.0108407	0.00168634
Insulin resistance	0.0108407	0.00168875
HIF-1 signaling pathway	0.0108632	0.00174684
TNF signaling pathway	0.0116352	0.00192945
Chemokine signaling pathway	0.0124683	0.00213026
Hedgehog signaling pathway	0.0132326	0.00232733
Legionellosis	0.0135338	0.00244833
Viral carcinogenesis	0.0145815	0.00271113
Oocyte meiosis	0.0168597	0.00321943
MicroRNAs in cancer	0.0174318	0.00343657
Inflammatory bowel disease	0.0174318	0.00355741
Vascular smooth muscle contraction	0.0174318	0.00359148
Adipocytokine signaling pathway	0.0199467	0.00420986
Non-small cell lung cancer	0.021954	0.00474382
p53 signaling pathway	0.0222992	0.00493047
Cell adhesion molecules	0.0231983	0.00524586
Chemical carcinogenesis	0.0234348	0.0054171
Non-alcoholic fatty liver disease	0.0261148	0.00616782
Endocytosis	0.0279734	0.00674735
Hepatitis B	0.0286235	0.00719184
JAK-STAT signaling pathway	0.0286235	0.00719184
Alzheimer disease	0.0308673	0.00791071
Tight junction	0.0318494	0.00832244
Rheumatoid arthritis	0.0361107	0.00961742
Dilated cardiomyopathy	0.0386327	0.0104832
Progesterone-mediated oocyte maturation	0.0423542	0.0117059
Longevity regulating pathway	0.0438753	0.0123468
C-type lectin receptor signaling pathway	0.0441196	0.0130075
Aldosterone-regulated sodium reabsorption	0.0441196	0.0130807
Thyroid cancer	0.0441196	0.0130807
Pathogenic Escherichia coli infection	0.0464074	0.0139922
Epstein-Barr virus infection	0.0496177	0.0152094
Diabetic cardiomyopathy	0.0496238	0.0154607
Proteoglycans in cancer	0.0504479	0.0159709
Rap1 signaling pathway	0.0537696	0.0172927
Growth hormone synthesis, secretion and action	0.0569493	0.0186015
Human cytomegalovirus infection	0.0653116	0.0216611
Arginine and proline metabolism	0.0676934	0.0231314
Cholesterol metabolism	0.0676934	0.0231314
Coronavirus disease	0.068237	0.0239111
Ovarian steroidogenesis	0.068237	0.024003
Apelin signaling pathway	0.0741301	0.0268209
Estrogen signaling pathway	0.0741301	0.0268209
Regulation of lipolysis in adipocytes	0.0748563	0.0276211
Measles	0.0748563	0.027836
Salmonella infection	0.0794656	0.0299493
Basal cell carcinoma	0.0916478	0.0354617
Cytosolic DNA-sensing pathway	0.0916478	0.0354617
Oxytocin signaling pathway	0.0920843	0.0360934
Acute myeloid leukemia	0.0999207	0.039667
Renal cell carcinoma	0.102785	0.0418373
Renin secretion	0.102785	0.0418373
Epithelial cell signaling in Helicobacter pylori infection	0.104205	0.0429388
Wnt signaling pathway	0.104313	0.0435075
Melanoma	0.10702	0.0451743
PPAR signaling pathway	0.109863	0.047452
Influenza A	0.109863	0.0474786
Thyroid hormone synthesis	0.11118	0.0486064
Pertussis	0.111409	0.049771
Ubiquinone and other terpenoid-quinone biosynthesis	0.111409	0.0505141
Arrhythmogenic right ventricular cardiomyopathy	0.111409	0.0509456
Bacterial invasion of epithelial cells	0.111409	0.0509456
Insulin secretion	0.134005	0.0619519
Kaposi sarcoma-associated herpesvirus infection	0.134205	0.0627188
Gap junction	0.136546	0.0644989
PD-L1 expression and PD-1 checkpoint pathway in cancer	0.137803	0.0657856
Bile secretion	0.139053	0.0670808
Th1 and Th2 cell differentiation	0.142986	0.0696967
Pathways of neurodegeneration	0.148702	0.07323
Circadian entrainment	0.153531	0.0763796
Human immunodeficiency virus 1 infection	0.155657	0.0782194
Hematopoietic cell lineage	0.155866	0.0791079
Melanogenesis	0.159646	0.0818665
Chagas disease	0.159646	0.0832569
Regulation of actin cytoskeleton	0.159646	0.0834329
NF-kappa B signaling pathway	0.161564	0.0860594
Toll-like receptor signaling pathway	0.161564	0.0860594
Parathyroid hormone synthesis, secretion and action	0.165319	0.0888902
Ras signaling pathway	0.177181	0.0961587
Arginine biosynthesis	0.179835	0.0985025
Glutamatergic synapse	0.180143	0.100482
Leukocyte transendothelial migration	0.180143	0.100482
Renin-angiotensin system	0.182554	0.102744
Neurotrophin signaling pathway	0.188403	0.107929
Sphingolipid signaling pathway	0.188403	0.107929
AMPK signaling pathway	0.189372	0.109436
Thyroid hormone signaling pathway	0.190335	0.110949
Platelet activation	0.196483	0.11552
Osteoclast differentiation	0.202606	0.120138
Purine metabolism	0.206095	0.123243
FoxO signaling pathway	0.209559	0.126367
Yersinia infection	0.223423	0.13585
Ubiquitin mediated proteolysis	0.229422	0.140651
Signaling pathways regulating pluripotency of stem cells	0.235382	0.145487
Retrograde endocannabinoid signaling	0.246543	0.153625
DNA replication	0.248546	0.156122
African trypanosomiasis	0.251734	0.160095
MAPK signaling pathway	0.251734	0.160654
Hepatitis C	0.261944	0.168487
Nicotine addiction	0.265186	0.171905
Homologous recombination	0.269116	0.175805
Graft-versus-host disease	0.270891	0.179686
Tryptophan metabolism	0.270891	0.179686
Hepatocellular carcinoma	0.278296	0.186966
Vasopressin-regulated water reabsorption	0.278296	0.187395
Basal transcription factors	0.281877	0.191223
Type II diabetes mellitus	0.285379	0.195033
Intestinal immune network for IgA production	0.294287	0.202599
Cocaine addiction	0.296518	0.206356
Tuberculosis	0.296518	0.207432
NOD-like receptor signaling pathway	0.296518	0.209149
Cysteine and methionine metabolism	0.296518	0.210095
Neuroactive ligand-receptor interaction	0.302969	0.216189
Endocrine and other factor-regulated calcium reabsorption	0.307836	0.221209
Pyrimidine metabolism	0.320843	0.232168
Endometrial cancer	0.328541	0.239389
VEGF signaling pathway	0.329275	0.242974
Amyotrophic lateral sclerosis	0.329275	0.244722
Long-term depression	0.329275	0.246543
Viral myocarditis	0.329275	0.246543
Steroid hormone biosynthesis	0.331792	0.250095
Cortisol synthesis and secretion	0.348101	0.264137
Long-term potentiation	0.354876	0.271061
Mitophagy	0.356584	0.274498
Amphetamine addiction	0.356584	0.27792
Central carbon metabolism in cancer	0.356584	0.281325
Prolactin signaling pathway	0.356584	0.281325
RIG-I-like receptor signaling pathway	0.356584	0.281325
Chronic myeloid leukemia	0.372572	0.301427
Gastric acid secretion	0.372572	0.301427
Metabolism of xenobiotics by cytochrome P450	0.372572	0.301427
Pancreatic cancer	0.372572	0.301427
Leishmaniasis	0.37432	0.304723
Synaptic vesicle cycle	0.376029	0.308003
Calcium signaling pathway	0.378085	0.311587
B cell receptor signaling pathway	0.38323	0.317753
Shigellosis	0.385963	0.321959
Complement and coagulation cascades	0.393879	0.330542
Taste transduction	0.395277	0.333701
GABAergic synapse	0.403997	0.343093
Morphine addiction	0.408864	0.349281
GnRH signaling pathway	0.411203	0.355411
Salivary secretion	0.411203	0.355411
Staphylococcus aureus infection	0.415812	0.361484
Prion disease	0.418904	0.368094
Aldosterone synthesis and secretion	0.418904	0.370488
Inflammatory mediator regulation of TRP channels	0.418904	0.370488
Pancreatic secretion	0.429816	0.382298
Protein digestion and absorption	0.430663	0.385216
T cell receptor signaling pathway	0.431486	0.388121
Cholinergic synapse	0.457321	0.413657
Huntington disease	0.46482	0.422776
Lysosome	0.496292	0.453895
Dopaminergic synapse	0.504738	0.464156
Autophagy	0.512789	0.476714
Insulin signaling pathway	0.512789	0.476714
Apoptosis	0.522933	0.48898
Spinocerebellar ataxia	0.522933	0.491399
Breast cancer	0.529296	0.500962
Phospholipase D signaling pathway	0.529296	0.503325
Adrenergic signaling in cardiomyocytes	0.529296	0.508018
Spliceosome	0.529296	0.508018
Phagosome	0.531357	0.512666
mTOR signaling pathway	0.532949	0.517271
Cushing syndrome	0.532949	0.519558
Protein processing in endoplasmic reticulum	0.566095	0.554717
Neutrophil extracellular trap formation	0.600284	0.591234
Thermogenesis	0.673681	0.66691
Herpes simplex virus 1 infection	0.686358	0.682909
Parkinson disease	0.692846	0.692846
