# Supplementary material for: scCDX: enhancing cancer driver gene identification and model interpretability with single-cell RNA sequencing data and extreme gradient boosting
Source: Research Square preprint supplement (doi:10.21203/rs.3.rs-4222777/v1), 2024-04-11
Supplement: Supplementary file 4 [file a7f21ccc89fc8e6de26d7053.xlsx]

## Sheet: Newly predicted genes
Rank	Gene	Overlapped	NCG	OncoKB	ONGene	TSGene	CancerMine	CCGD_A
1	PRKDC	TRUE	TRUE	FALSE	FALSE	FALSE	TRUE	FALSE
2	FYN	TRUE	TRUE	TRUE	TRUE	FALSE	TRUE	TRUE
3	SPTBN1	TRUE	FALSE	FALSE	FALSE	TRUE	TRUE	TRUE
4	LRP2	FALSE	FALSE	FALSE	FALSE	FALSE	FALSE	FALSE
5	SPTA1	TRUE	TRUE	FALSE	FALSE	FALSE	TRUE	FALSE
6	AHNAK	TRUE	TRUE	FALSE	FALSE	TRUE	TRUE	TRUE
7	HSPG2	TRUE	TRUE	FALSE	FALSE	FALSE	TRUE	FALSE
8	FOS	TRUE	FALSE	FALSE	TRUE	FALSE	TRUE	FALSE
9	KMT2E	TRUE	TRUE	FALSE	FALSE	FALSE	TRUE	TRUE
10	LRP1	TRUE	TRUE	FALSE	FALSE	FALSE	TRUE	FALSE
11	FN1	TRUE	FALSE	FALSE	FALSE	FALSE	TRUE	FALSE
12	EXOC4	TRUE	FALSE	FALSE	FALSE	FALSE	FALSE	TRUE
13	NR3C1	TRUE	TRUE	FALSE	FALSE	FALSE	TRUE	TRUE
14	WNK1	TRUE	TRUE	FALSE	FALSE	FALSE	TRUE	TRUE
15	ANK3	TRUE	TRUE	FALSE	FALSE	FALSE	FALSE	TRUE
16	LYN	TRUE	TRUE	TRUE	FALSE	FALSE	TRUE	TRUE
17	NFKBIA	TRUE	TRUE	TRUE	FALSE	FALSE	TRUE	FALSE
18	PLCG2	TRUE	TRUE	TRUE	FALSE	FALSE	TRUE	TRUE
19	NOTCH3	TRUE	TRUE	TRUE	FALSE	TRUE	TRUE	FALSE
20	FKBP5	TRUE	FALSE	FALSE	FALSE	FALSE	TRUE	TRUE
21	VWF	TRUE	TRUE	FALSE	FALSE	FALSE	TRUE	FALSE
22	SPTAN1	TRUE	TRUE	FALSE	FALSE	FALSE	FALSE	FALSE
23	MEIS1	TRUE	FALSE	FALSE	TRUE	FALSE	TRUE	FALSE
24	LRP6	TRUE	FALSE	TRUE	FALSE	FALSE	TRUE	TRUE
25	TEK	TRUE	FALSE	TRUE	FALSE	FALSE	TRUE	FALSE
26	LRRK2	TRUE	TRUE	FALSE	FALSE	FALSE	TRUE	FALSE
27	GLI3	TRUE	TRUE	FALSE	TRUE	FALSE	TRUE	TRUE
28	PIK3CD	TRUE	TRUE	TRUE	FALSE	FALSE	TRUE	FALSE
29	DST	TRUE	TRUE	FALSE	FALSE	FALSE	TRUE	FALSE
30	SYNE2	TRUE	TRUE	FALSE	FALSE	FALSE	TRUE	FALSE
31	PRG2	FALSE	FALSE	FALSE	FALSE	FALSE	FALSE	FALSE
32	RELB	TRUE	TRUE	FALSE	FALSE	FALSE	TRUE	FALSE
33	UTRN	TRUE	FALSE	FALSE	FALSE	FALSE	TRUE	TRUE
34	SDC1	TRUE	FALSE	FALSE	FALSE	FALSE	TRUE	FALSE
35	TLE4	TRUE	TRUE	TRUE	FALSE	FALSE	TRUE	FALSE
36	DLG1	TRUE	FALSE	FALSE	FALSE	TRUE	TRUE	TRUE
37	SMARCC1	TRUE	FALSE	FALSE	FALSE	TRUE	TRUE	TRUE
38	CHD3	TRUE	TRUE	FALSE	FALSE	FALSE	FALSE	FALSE
39	ITGA4	TRUE	TRUE	FALSE	FALSE	FALSE	FALSE	FALSE
40	COL1A2	TRUE	TRUE	FALSE	FALSE	FALSE	FALSE	FALSE
41	MYCBP2	TRUE	TRUE	FALSE	FALSE	FALSE	FALSE	FALSE
42	RXRA	TRUE	TRUE	TRUE	FALSE	FALSE	TRUE	TRUE
43	APOB	TRUE	TRUE	FALSE	FALSE	FALSE	TRUE	FALSE
44	INSR	TRUE	TRUE	TRUE	FALSE	FALSE	TRUE	TRUE
45	GRM1	TRUE	TRUE	FALSE	TRUE	FALSE	TRUE	FALSE
46	SOS1	TRUE	TRUE	TRUE	FALSE	FALSE	TRUE	TRUE
47	TP53BP1	TRUE	TRUE	TRUE	FALSE	TRUE	TRUE	FALSE
48	PAK2	TRUE	FALSE	FALSE	FALSE	FALSE	TRUE	TRUE
49	COL5A1	TRUE	TRUE	FALSE	FALSE	FALSE	TRUE	FALSE
50	PARD3	TRUE	TRUE	FALSE	FALSE	FALSE	TRUE	TRUE
51	KPNB1	TRUE	TRUE	FALSE	FALSE	FALSE	TRUE	FALSE
52	CAND1	FALSE	FALSE	FALSE	FALSE	FALSE	FALSE	FALSE
53	PRPF8	TRUE	FALSE	TRUE	FALSE	FALSE	TRUE	FALSE
54	ITGB3	TRUE	FALSE	FALSE	FALSE	TRUE	TRUE	FALSE
55	HSP90B1	TRUE	FALSE	FALSE	FALSE	TRUE	TRUE	FALSE
56	PRKD1	TRUE	TRUE	TRUE	FALSE	FALSE	TRUE	FALSE
57	USP9X	TRUE	TRUE	FALSE	FALSE	FALSE	TRUE	TRUE
58	SYNE1	TRUE	TRUE	FALSE	FALSE	FALSE	FALSE	FALSE
59	HERC1	TRUE	TRUE	FALSE	FALSE	FALSE	FALSE	TRUE
60	PRKCA	TRUE	FALSE	FALSE	TRUE	FALSE	TRUE	TRUE
61	DMD	TRUE	TRUE	FALSE	FALSE	TRUE	TRUE	TRUE
62	DAB2	TRUE	FALSE	FALSE	FALSE	TRUE	TRUE	FALSE
63	RASA1	TRUE	TRUE	TRUE	FALSE	FALSE	TRUE	TRUE
64	SERPINA1	TRUE	TRUE	FALSE	FALSE	FALSE	TRUE	FALSE
65	HUWE1	TRUE	TRUE	FALSE	FALSE	FALSE	TRUE	TRUE
66	MACF1	TRUE	TRUE	FALSE	FALSE	FALSE	FALSE	FALSE
67	CCR5	TRUE	TRUE	FALSE	FALSE	FALSE	TRUE	FALSE
68	VCAN	TRUE	TRUE	FALSE	FALSE	FALSE	TRUE	FALSE
69	HSPA1B	TRUE	FALSE	FALSE	FALSE	FALSE	TRUE	FALSE
70	TJP1	TRUE	TRUE	FALSE	FALSE	FALSE	TRUE	FALSE
71	TFAP2A	TRUE	TRUE	FALSE	FALSE	TRUE	TRUE	FALSE
72	ROBO1	TRUE	FALSE	TRUE	FALSE	TRUE	TRUE	FALSE
73	PLXNA4	FALSE	FALSE	FALSE	FALSE	FALSE	FALSE	FALSE
74	SRRM2	FALSE	FALSE	FALSE	FALSE	FALSE	FALSE	FALSE
75	SOCS3	TRUE	FALSE	TRUE	FALSE	TRUE	TRUE	FALSE
76	TLN1	TRUE	FALSE	FALSE	FALSE	FALSE	TRUE	FALSE
77	PTK2	TRUE	TRUE	FALSE	FALSE	FALSE	TRUE	TRUE
78	HNF4A	TRUE	TRUE	FALSE	FALSE	TRUE	TRUE	TRUE
79	ZEB2	TRUE	FALSE	FALSE	FALSE	FALSE	TRUE	TRUE
80	TUBA1A	FALSE	FALSE	FALSE	FALSE	FALSE	FALSE	FALSE
81	CUL1	TRUE	TRUE	FALSE	FALSE	TRUE	TRUE	TRUE
82	PXN	TRUE	FALSE	FALSE	FALSE	FALSE	TRUE	FALSE
83	PPP3CA	TRUE	TRUE	FALSE	FALSE	FALSE	TRUE	TRUE
84	TNRC6B	TRUE	TRUE	FALSE	FALSE	FALSE	FALSE	TRUE
85	LAMA1	TRUE	FALSE	FALSE	FALSE	FALSE	TRUE	FALSE
86	UBR4	TRUE	FALSE	FALSE	FALSE	FALSE	FALSE	TRUE
87	BMPR2	TRUE	TRUE	FALSE	FALSE	TRUE	TRUE	FALSE
88	PPARGC1A	TRUE	FALSE	FALSE	FALSE	FALSE	TRUE	FALSE
89	PRKCQ	TRUE	TRUE	FALSE	FALSE	FALSE	FALSE	FALSE
90	GHR	TRUE	FALSE	FALSE	FALSE	FALSE	TRUE	TRUE
91	SH3KBP1	FALSE	FALSE	FALSE	FALSE	FALSE	FALSE	FALSE
92	PTPRZ1	TRUE	FALSE	FALSE	FALSE	FALSE	TRUE	FALSE
93	HERC2	TRUE	TRUE	FALSE	FALSE	FALSE	FALSE	TRUE
94	TGM2	TRUE	FALSE	FALSE	FALSE	FALSE	TRUE	FALSE
95	GAB2	TRUE	FALSE	TRUE	TRUE	FALSE	TRUE	TRUE
96	PTK2B	TRUE	TRUE	FALSE	TRUE	FALSE	TRUE	FALSE
97	AP1G1	TRUE	FALSE	FALSE	FALSE	FALSE	TRUE	TRUE
98	NRP1	TRUE	TRUE	FALSE	FALSE	FALSE	TRUE	TRUE
99	SALL1	TRUE	TRUE	FALSE	FALSE	FALSE	TRUE	FALSE
100	STAT4	TRUE	TRUE	FALSE	FALSE	FALSE	TRUE	FALSE
